# Supplementary material
Source: PubMed Central journal article supplement (PMC6648500)
Supplement: ao8b02932_si_001.pdf [file ao8b02932_si_001.pdf]

## Supporting information

# **Synthesis of benzoxazoles, benzimidazoles, and benzothiazoles using Brønsted acidic ionic liquid gel as an efficient heterogeneous catalyst under solvent-free condition.**

The Thai Nguyen,<sup>a</sup> Xuan-Trang Thi Nguyen,<sup>a</sup> Thuy-Linh Ho Nguyen,<sup>a,b</sup> Phuong Hoang Tran<sup>a,\*</sup>

<sup>a</sup> Department of Organic Chemistry, Faculty of Chemistry, University of Science, Vietnam National University – Ho Chi Minh City, 721337, Viet Nam.

<sup>b</sup> Center for Innovative Materials and Architectures, Vietnam National University – Ho Chi Minh City, 721337, Viet Nam

\*Corresponding author: phone number: +84-903-706-762; e-mail: thphuong@hcmus.edu.vn

### Table of contents

|                                                                     |                |
|---------------------------------------------------------------------|----------------|
| <b>Section S1. Preparation and characterization of BAIL gel</b>     | <b>S2-S5</b>   |
| <b>Section S2. Spectral data</b>                                    | <b>S6-S16</b>  |
| <b>Section S3. <sup>1</sup>H, <sup>13</sup>C NMR and MS spectra</b> | <b>S17-S44</b> |
| <b>Section S4. References</b>                                       | <b>S45-S46</b> |

## Section S1. Preparation and characterization of BAIL gel

All commercially available reagent-grade chemicals were purchased from chemical suppliers and used as received without further purification unless otherwise noted.

### *Preparation of 1-(4-sulfonic acid)butyl-3-methylimidazolium hydrogen sulfate ionic liquid (BAIL)*

1-Methylimidazolium (123 mg, 1.5 mmol) and 1,4-butane sultone (0.204 mg, 1.5 mmol) were added into a glass-tube with Teflon cap. After 1 h of sonication, the reaction mixture was washed with diethyl ether (6 x 5 mL) and dried at 80 °C in 60 min. The obtained witterion (1.5 mmol, 327 mg) was then mixed with sulfuric acid (147 mg, 1.5 mmol). The resulting mixture was sonicated at room temperature for 2 h. The crude product was then washed with diethyl ether (10 x 3 mL) and dried under vacuum at 80 °C in 60 min. The BAIL was characterized by FT-IR, <sup>1</sup>H and <sup>13</sup>C NMR, HRMS (ESI).

1-(4-sulfonic acid)butyl-3-methylimidazolium hydrogen sulfate ionic liquid. FT-IR (KBr, cm<sup>-1</sup>): 3410, 1639, 1457, 1171, 1042, 752; <sup>1</sup>H NMR (500 MHz, D<sub>2</sub>O) δ 8.59 (s, 1H), 7.35 (t, *J* = 1.7 Hz, 1H), 7.29 (t, *J* = 1.7 Hz, 1H), 4.10 (t, *J* = 7.0 Hz, 2H), 3.75 (s, 3H), 2.83 (t, *J* = 8.0, 2H), 1.82 (m, 2H), 1.60 (m, 2H); <sup>13</sup>C NMR (125 MHz, D<sub>2</sub>O) δ 135.9, 123.6, 122.1, 50.0, 48.9, 35.7, 28.1, 20.9; HRMS (ESI) *m/z* calcd for [M]<sup>+</sup> C<sub>8</sub>H<sub>15</sub>N<sub>2</sub>O<sub>3</sub>S<sup>+</sup> 219.0798, found 219.0783.

### *Preparation of BAIL gel*

The BAIL (3.1635 g, 10 mmol), TEOS (3.125 g, 15 mmol) and ethanol (1.380 g, 30 mmol) were added to a 20 mL round-bottom flask and stirred for 10 min until the mixture became homogeneous. The mixture was left to stand and gelled in a week. The gel was then subjected to aging for 3 weeks. After that, the gel was transferred into a 100 mL round-bottom flask containing 50 mL of ethanol and heated to reflux for 2 h. The BAIL gel was washed with toluene (5 x 10 mL) and dried under vacuum for 3 h. It was finally characterized by FT-IR, TGA, ICP-OES, SEM, and EDS.

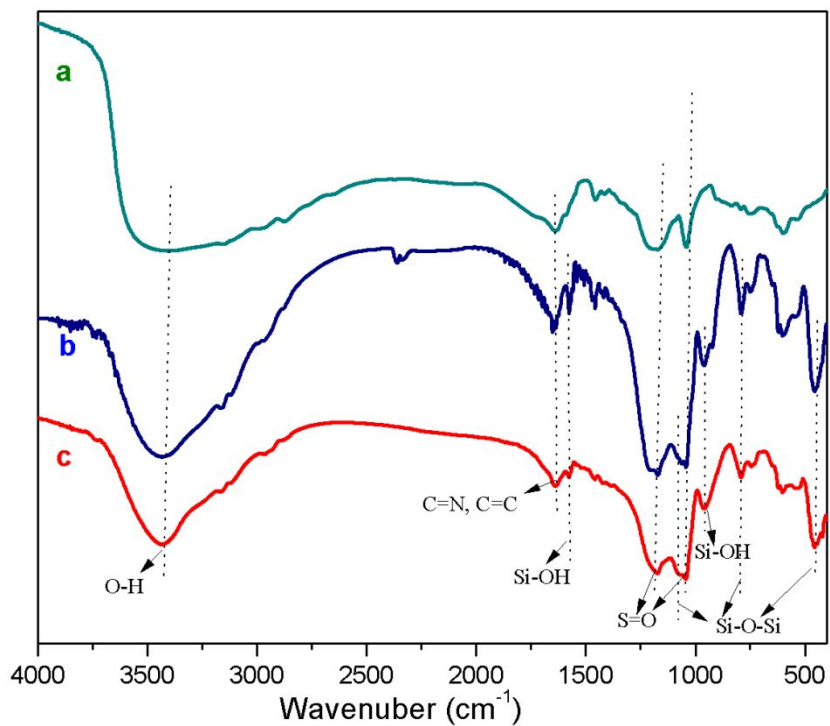

**Figure S1.** FT-IR spectra of BAIL (a), BAIL gel (b) and BAIL gel after the fifth recovery (c).

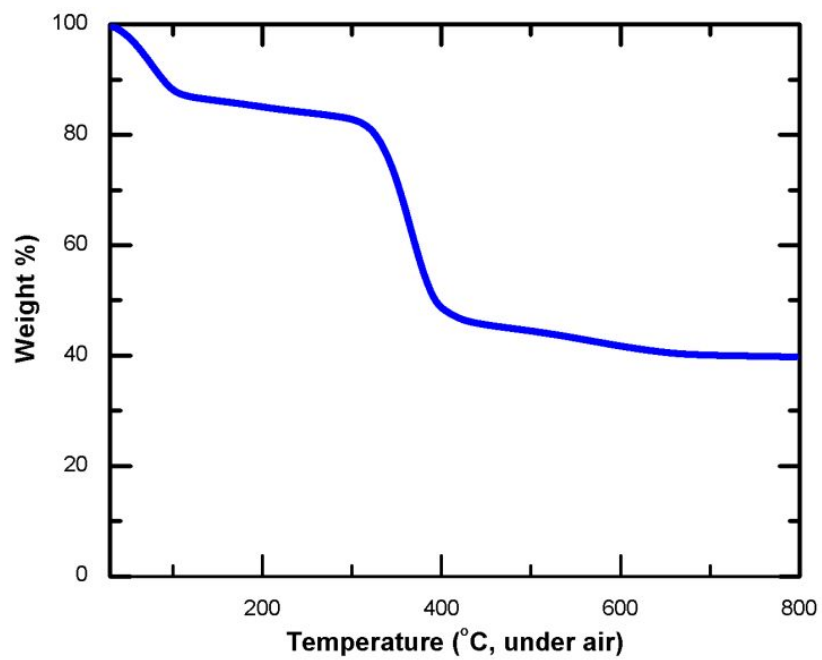

**Figure S2.** TG analysis of BAIL gel

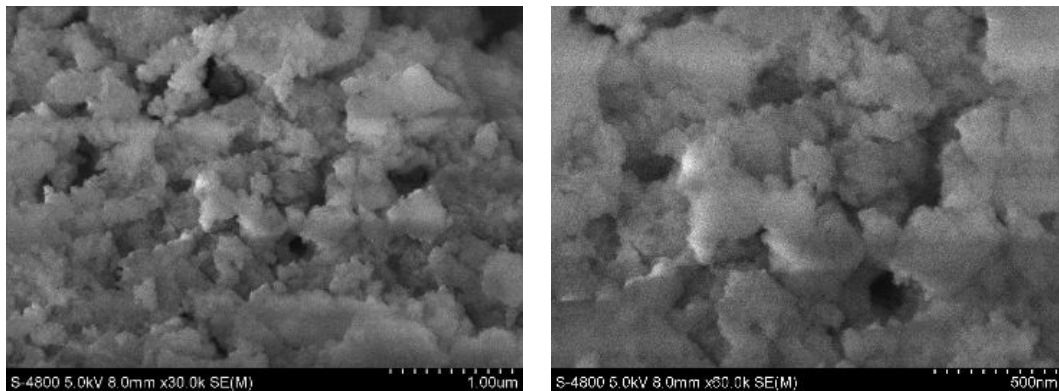

**Figure S3.** The SEM image of BAIL gel.

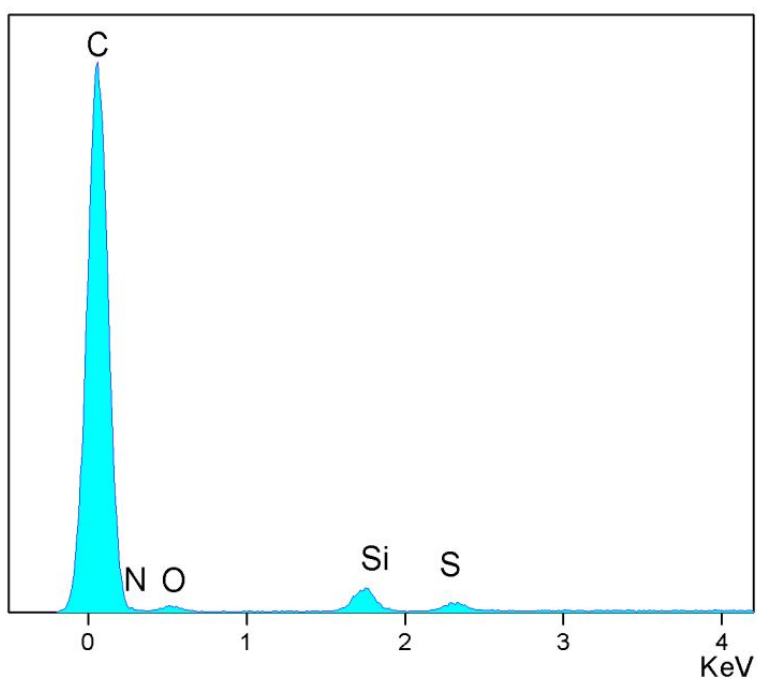

**Figure S4.** EDS spectrum of BAIL gel.

## Section S2. Spectral data

### 2-Phenylbenzoxazole (1)<sup>1,2</sup>

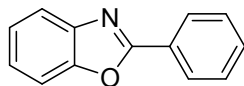

**Melting point:** 102-103.5 °C

**FT-IR** (KBr, 4000-400 cm<sup>-1</sup>) 3059, 2925, 2854, 1775, 1615, 1551, 1475, 1448, 1285, 1240.

**<sup>1</sup>H NMR** (500 MHz, CDCl<sub>3</sub>) δ 8.31-8.22 (m, 2H), 7.82-7.75 (m, 1H), 7.61-7.56 (m, 1H), 7.55-7.50 (m, 3H), 7.40-7.33 (m, 2H).

**<sup>13</sup>C NMR** (125 MHz, CDCl<sub>3</sub>) δ 163.2, 150.9, 142.2, 131.7, 129.0, 127.8, 127.3, 125.3, 124.7, 120.1, 110.7.

**GC-MS** (EI, 70 eV) *m/z* 195 ([M]<sup>+</sup>).

### 2-(*p*-Tolyl)benzoxazole (2)<sup>1-3</sup>

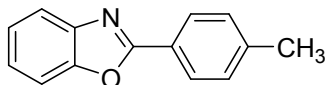

**Melting point:** 113-114.5 °C

**FT-IR** (KBr, 4000-400 cm<sup>-1</sup>) 3056, 2920, 2854, 1728, 1620, 1554, 1499, 1450, 1242.

**<sup>1</sup>H NMR** (500 MHz, CDCl<sub>3</sub>) δ 8.17-8.13 (m, 2H), 7.77-7.74 (m, 1H), 7.58-7.50 (m, 1H), 7.35-7.31 (m, 4H), 2.44 (s, 3H).

**<sup>13</sup>C NMR** (125 MHz, CDCl<sub>3</sub>) δ 163.5, 150.8, 142.3, 142.2, 129.8, 127.8, 125.1, 124.7, 124.5, 120.0, 110.6, 21.8.

**GC-MS** (EI, 70 eV) *m/z* 209 ([M]<sup>+</sup>).

### 2-(4-Methoxyphenyl)benzoxazole (3)<sup>2</sup>

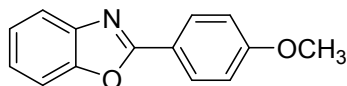

**Melting point:** 103-104.5 °C

**FT-IR** (KBr, 4000-400 cm<sup>-1</sup>) 3050, 2924, 2849, 1615, 1501, 1450, 1420, 1244.

**<sup>1</sup>H NMR** (500 MHz, CDCl<sub>3</sub>) δ 8.23-8.17 (m, 2H), 7.75-7.73 (m, 1H), 7.56-7.54 (m, 1H), 7.35-7.29 (m, 2H), 7.05-7.01 (m, 2H), 3.89 (s, 3H).

$^{13}\text{C}$  NMR (125 MHz,  $\text{CDCl}_3$ )  $\delta$  163.3, 162.6, 150.8, 142.1, 129.7, 124.8, 124.7, 119.7, 119.7, 114.6, 110.6, 55.6.

GC-MS (EI, 70 eV)  $m/z$  225 ( $[\text{M}]^+$ ).

#### 2-(4-*tert*-Butylphenyl)benzoxazole (4)<sup>2</sup>

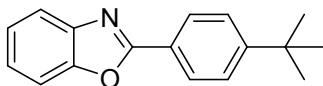

**Melting point:** 107-108 °C

**FT-IR** (KBr, 4000-400  $\text{cm}^{-1}$ ) 3059, 2927, 1728, 1547, 1452, 1429, 1287, 1239.

$^1\text{H}$  NMR (500 MHz,  $\text{CDCl}_3$ )  $\delta$  8.21-8.16 (m, 2H), 7.78-7.75 (m, 1H), 7.60-7.56 (m, 1H), 7.56-7.54 (m, 2H), 7.37-7.32 (m, 2H), 1.38 (s, 9H).

$^{13}\text{C}$  NMR (125 MHz,  $\text{CDCl}_3$ )  $\delta$  163.4, 155.4, 150.8, 142.1, 127.7, 126.1, 125.1, 124.7, 124.4, 120.0, 110.7, 35.2, 31.3.

GC-MS (EI, 70 eV)  $m/z$  251 ( $[\text{M}]^+$ ).

#### 2-(4-Fluorophenyl)benzoxazole (5)<sup>2</sup>

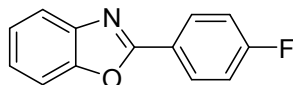

**Melting point:** 99-99.5 °C

**FT-IR** (KBr, 4000-400  $\text{cm}^{-1}$ ) 3061, 2925, 1619, 1584, 1582, 1542, 1473, 1448, 1247, 1225.

$^1\text{H}$  NMR (500 MHz,  $\text{CDCl}_3$ )  $\delta$  8.30-8.22 (m, 2H), 7.80-7.72 (m, 1H), 7.60-7.53 (m, 1H), 7.40-7.32 (m, 2H), 7.23-7.17 (m, 2H).

$^{13}\text{C}$  NMR (125 MHz,  $\text{CDCl}_3$ )  $\delta$  166.0 (s), 164.0(s), 162.3 (s), 150.9 (s), 142.2 (s), 130.0 (d,  $J = 255.1$  Hz), 130.0 (d,  $J = 8.8$  Hz), 125.0 (d,  $J = 59.5$  Hz), 123.67 (d,  $J = 3.2$  Hz), 120.14 (s), 116.3 (d,  $J = 44.0$  Hz), 110.7 (s).

GC-MS (EI, 70 eV)  $m/z$  213 ( $[\text{M}]^+$ ).

#### 2-(4-Chlorophenyl)benzoxazole (6)<sup>2</sup>

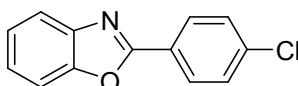

**Melting point:** 148-150 °C

**FT-IR** (KBr, 4000-400  $\text{cm}^{-1}$ ) 3067, 2922, 1725, 1607, 1451, 1428, 1237.

**$^1\text{H}$  NMR** (500 MHz,  $\text{CD}_3\text{CO}$ )  $\delta$  8.26-8.22 (m, 2H), 7.77-7.75 (m, 1H), 7.70-7.69 (m, 1H), 7.65-7.62 (m, 2H), 7.42 (pd,  $J = 7.5, 2.0$  Hz, 2H).

**$^{13}\text{C}$  NMR** (125 MHz,  $\text{CD}_3\text{CO}$ )  $\delta$  161.7, 150.8, 142.1, 137.2, 129.3, 129.0, 125.9, 125.6, 124.9, 120.0, 110.7.

**GC-MS** (EI, 70 eV)  $m/z$  229.5 ( $[\text{M}]^+$ ).

### 2-(4-Nitrophenyl)benzoxazole (7)<sup>3</sup>

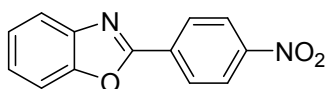

**Melting point:** 156-157  $^{\circ}\text{C}$

**FT-IR** (KBr, 4000-400  $\text{cm}^{-1}$ ) 2925, 2854, 1678, 1610, 1534, 1449, 1237.

**$^1\text{H}$  NMR** (500 MHz,  $\text{CDCl}_3$ )  $\delta$  8.15 (dd,  $J = 8.0, 1.0$  Hz, 1H), 7.89 (dd,  $J = 8.0, 1.0$  Hz, 1H), 7.83-7.80 (m, 1H), 7.74 (td,  $J = 8.0, 1.0$  Hz, 1H), 7.69 (td,  $J = 8.0, 1.0$  Hz, 1H), 7.59-7.57 (m, 1H), 7.42-7.37 (m, 2H).

**$^{13}\text{C}$  NMR** (125 MHz,  $\text{CDCl}_3$ )  $\delta$  158.9, 151.2, 141.7, 132.4, 132.0, 131.6, 126.2, 125.1, 124.3, 121.7, 120.9, 111.1.

**GC-MS** (EI, 70 eV)  $m/z$  240 ( $[\text{M}]^+$ ).

### 2-(Pyridin-4-yl)benzoxazole (8)

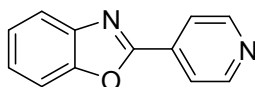

**Melting point:** 102-104  $^{\circ}\text{C}$

**FT-IR** (KBr, 4000-400  $\text{cm}^{-1}$ ) 3460, 2946, 1628, 878.

**$^1\text{H}$  NMR** (500 MHz,  $\text{CDCl}_3$ )  $\delta$  8.82 (d,  $J = 5.5$  Hz, 2H), 8.09 (d,  $J = 6.0$  Hz, 2H), 7.84-7.80 (m, 1H), 7.63 (m, 1H), 7.42 (m, 2H).

**$^{13}\text{C}$  NMR** (125 MHz,  $\text{CDCl}_3$ )  $\delta$  161.0, 151.1, 150.9, 141.9, 134.6, 126.5, 125.3, 121.2, 120.9, 111.1.

**GC-MS** (EI, 70 eV)  $m/z$  196 ( $[\text{M}]^+$ )

### 5-Methyl-2-phenylbenzoxazole (9)<sup>2</sup>

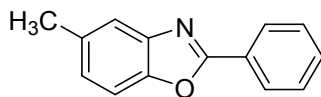

**Melting point:** 112-115 °C

**FT-IR** (KBr, 4000-400 cm<sup>-1</sup>) 2918, 1626, 1552, 1445, 1263.

**<sup>1</sup>H NMR** (500 MHz, acetone-*d*<sub>6</sub>) δ 8.25-8.23 (m, 2H), 7.62-7.59 (m, 3H), 7.57-7.56 (m, 2H), 7.24 (d, *J* = 8.5, 1H), 2.47 (s, 3H).

**<sup>13</sup>C NMR** (125 MHz, CDCl<sub>3</sub>) δ 163.3, 149.2, 142.5, 134.5, 131.5, 129.0, 127.7, 127.5, 126.4, 120.1, 110.1, 21.6.

**GC-MS** (EI, 70 eV) *m/z* 209 ([M]<sup>+</sup>).

#### 5-Methyl-2-(*p*-tolyl)benzoxazole (10)<sup>4</sup>

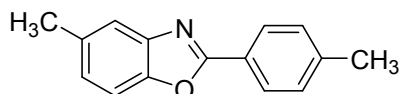

**Melting point:** 138-139 °C.

**FT-IR** (KBr, 4000-400 cm<sup>-1</sup>) 3304, 2921, 2856, 1616, 1555, 1499, 1332, 1262.

**<sup>1</sup>H NMR** (500 MHz, acetone-*d*<sub>6</sub>) δ 8.11 (d, *J* = 8.0 Hz, 2H), 7.53-7.51 (m, 2H), 7.39 (d, *J* = 8.0 Hz, 2H), 7.22-7.19 (m, 1H), 2.46 (s, 3H), 2.43 (s, 3H).

**<sup>13</sup>C NMR** (125 MHz, acetone-*d*<sub>6</sub>) δ 163.2, 149.2, 142.7, 142.3, 134.5, 129.9, 127.5, 126.3, 124.8, 119.9, 110.1, 20.9, 20.8.

**GC-MS** (EI, 70 eV) *m/z* 223 ([M]<sup>+</sup>).

#### 5-Methyl-2-(4-*tert*-butylphenyl)benzoxazole (11)<sup>5</sup>

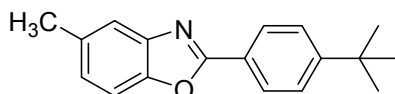

**Melting point:** 137-140 °C

**FT-IR** (KBr, 4000-400 cm<sup>-1</sup>) 3107, 2963, 2930, 2871, 1729, 1621, 1532, 1460, 1269.



**<sup>1</sup>H NMR** (500 MHz, acetone-*d*<sub>6</sub>)  $\delta$  8.56 (d, *J* = 2.0 Hz, 1H), 8.34 (dd, *J* = 9.0, 2.0 Hz, 1H), 8.20 (d, *J* = 8.5 Hz, 2H), 7.92 (d, *J* = 9.0 Hz, 1H), 7.69 (d, *J* = 9.0 Hz, 2H), 2.81 (s, 3H), 1.39 (s, 9H).

**<sup>13</sup>C NMR** (125 MHz, acetone-*d*<sub>6</sub>)  $\delta$  162.9, 155.0, 149.0, 142.5, 134.3, 127.2, 126.1, 126.0, 124.6, 119.7, 109.9, 34.7, 30.5, 20.5.

**GC-MS** (EI, 70 eV) *m/z* 265 ([M]<sup>+</sup>).

#### 5-Methyl-2-(4-chlorophenyl)benzoxazole (12)<sup>4</sup>

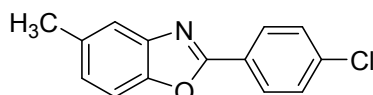

**Melting point:** 150-151°C

**FT-IR** (KBr, 4000-400 cm<sup>-1</sup>) 3102, 2930, 2875, 1759, 1635, 1530, 1462, 1272.

**<sup>1</sup>H NMR** (500 MHz, acetone-*d*<sub>6</sub>)  $\delta$  8.18 (d, *J* = 8.5 Hz, 2H), 7.55 (s, 1H), 7.50 (d, *J* = 8.5 Hz, 2H), 7.45 (d, *J* = 8.0 Hz, 1H), 7.17 (d, *J* = 9.0 Hz, 1H), 2.49 (s, 3H).

**<sup>13</sup>C NMR** (125 MHz, acetone-*d*<sub>6</sub>)  $\delta$  162.3, 149.2, 142.4, 137.7, 134.7, 129.3, 128.9, 126.6, 126.0, 120.1, 110.1, 21.6.

**GC-MS** (EI, 70 eV) *m/z* 243.5 ([M]<sup>+</sup>).

#### 5-Methyl-2-(pyridin-4-yl)benzoxazole (13)

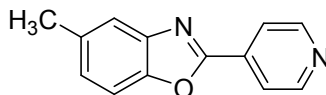

**Melting point:** 129-130 °C.

**FT-IR** (KBr, 4000-400 cm<sup>-1</sup>) 3406, 2921, 1612, 1537, 1414, 1344, 1068, 808.

**<sup>1</sup>H NMR** (500 MHz, acetone-*d*<sub>6</sub>)  $\delta$  8.80 (d, *J* = 4.5 Hz, 2H), 8.07 (d, *J* = 5.0 Hz, 2H), 7.59 (s, 1H), 7.48 (d, *J* = 8.5 Hz, 1H), 7.23 (d, *J* = 8.0 Hz, 1H), 2.50 (s, 3H).

**<sup>13</sup>C NMR** (125 MHz, acetone-*d*<sub>6</sub>) 160.8, 150.7, 149.3, 142.1, 135.2, 134.8, 127.7, 121.1, 120.6, 110.4, 21.6.

**GC-MS** (EI, 70 eV) *m/z* 210 ([M]<sup>+</sup>)

#### 5-Chloro-2-phenylbenzoxazole (14)<sup>6</sup>

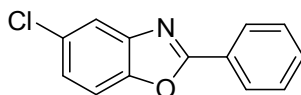

**Melting point:** 102-104 °C.

**FT-IR** (KBr, 4000-400  $\text{cm}^{-1}$ ) 3061, 1612, 1551, 1443, 1333, 1265.

**$^1\text{H}$  NMR** (500 MHz, acetone- $d_6$ )  $\delta$  8.23 (d,  $J = 7.5$  Hz, 2H), 7.77 (d,  $J = 1.5$  Hz, 1H), 7.70 (d,  $J = 7.5$  Hz, 1H), 7.64-7.59 (m, 3H), 7.42 (dd,  $J = 9.0, 1.5$  Hz, 1H).

**$^{13}\text{C}$  NMR** (125MHz, acetone- $d_6$ )  $\delta$  165.3, 150.6, 144.5, 133.1, 130.7, 130.2, 128.6, 127.7, 126.4, 120.7, 112.9.

**GC-MS** (EI, 70 eV)  $m/z$  229.5 ( $[\text{M}]^+$ ).

### 5-Chloro-2-(*p*-tolyl)benzoxazole (15)<sup>7</sup>

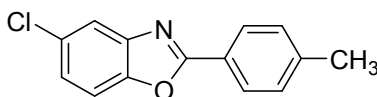

**Melting point:** 148-150 °C

**FT-IR** (KBr, 4000-400  $\text{cm}^{-1}$ ) 2953, 1610, 1551, 1479, 1448, 1258.

**$^1\text{H}$  NMR** (500 MHz, acetone- $d_6$ )  $\delta$  8.13 (d,  $J = 8.0$  Hz, 2H), 7.75 (d,  $J = 2.0$  Hz, 1H), 7.70 (d,  $J = 9.0$  Hz, 1H), 7.40-7.33 (m, 4H), 2.44 (s, 3H).

**$^{13}\text{C}$  NMR** (125 MHz, acetone- $d_6$ )  $\delta$  165.6, 150.5, 144.6, 143.8, 130.8, 130.6, 128.6, 126.2, 125.0, 120.5, 112.8, 21.7.

**GC-MS** (EI, 70 eV)  $m/z$  243.5 ( $[\text{M}]^+$ ).

### 5-Chloro-2-(4-*tert*-butylphenyl)benzoxazole (16)<sup>8</sup>

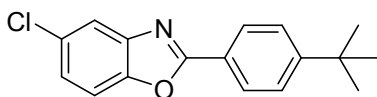

**Melting point:** 137-138 °C

**FT-IR** (KBr, 4000-400  $\text{cm}^{-1}$ ): 2957, 2902, 2866, 1611, 1552, 1493, 1457, 1262.

**$^1\text{H}$  NMR** (500 MHz, acetone- $d_6$ )  $\delta$  8.17 (d,  $J = 8.5$  Hz, 2H), 7.76 (s, 1H), 7.70 (d,  $J = 8.5$  Hz, 1H), 7.66 (d,  $J = 8.5$  Hz, 2H), 7.41 (dd,  $J = 8.5, 2.0$  Hz, 1H), 1.38 (s, 9H).

$^{13}\text{C}$  NMR (125 MHz, acetone- $d_6$ )  $\delta$  165.5, 156.7, 150.6, 144.6, 130.6, 128.6, 127.2, 126.2, 125.0, 120.5, 112.8, 35.9, 31.5.

GC-MS (EI, 70 eV)  $m/z$  285.5 ( $[\text{M}]^+$ ).

### 5-Chloro-2-(4-chlorophenyl)benzoxazole (17)<sup>7</sup>

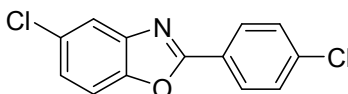

**Melting point:** 195-197°C

**FT-IR** (KBr, 4000-400  $\text{cm}^{-1}$ ) 2913, 1727, 1550, 1448, 1245.

$^1\text{H}$  NMR (500 MHz, acetone- $d_6$ )  $\delta$  8.28-8.23 (m, 2H), 7.81 (d,  $J = 1.5$  Hz, 1H), 7.74 (d,  $J = 8.5$  Hz, 1H), 7.69-7.65 (m, 2H), 7.46 (dd,  $J = 8.5, 2.0$  Hz, 1H).

$^{13}\text{C}$  NMR (125 MHz, acetone- $d_6$ )  $\delta$  149.6, 143.4, 137.7, 129.8, 129.4, 129.2, 125.7, 125.5, 119.7, 111.9.

GC-MS (EI, 70 eV)  $m/z$  285.5 ( $[\text{M}]^+$ ).

### 5-Chloro-2-(pyridin-4-yl)benzoxazole (18)

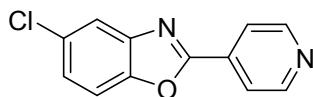

**Melting point:** 152-153 °C.

**FT-IR** (KBr, 4000-400  $\text{cm}^{-1}$ ) 3431, 2922, 1612, 1568, 1539, 1449, 1057, 874.

$^1\text{H}$  NMR (500 MHz, acetone- $d_6$ )  $\delta$  8.83 (d,  $J = 5.5$  Hz, 2H), 8.07 (dd,  $J = 4.5, 1.5$  Hz, 2H), 7.80 (d,  $J = 2.0$  Hz, 1H), 7.55 (d,  $J = 8.5$  Hz, 1H), 7.40 (dd,  $J = 8.5, 2.0$  Hz, 1H).

$^{13}\text{C}$  NMR (125 MHz, acetone- $d_6$ )  $\delta$  162.0, 150.8, 149.6, 143.0, 134.2, 130.9, 126.9, 121.3, 120.8, 111.9.

GC-MS (EI, 70 eV)  $m/z$  230 ( $[\text{M}]^+$ )

### 5-Nitro-2-phenylbenzoxazole (19)<sup>7</sup>

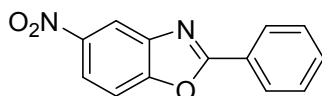

**Melting point:** 166-169 °C.

**FT-IR** (KBr, 4000-400  $\text{cm}^{-1}$ ): 3105, 2925, 2853, 1709, 1604, 1526, 1463, 1348, 1286.

**$^1\text{H}$  NMR** (500 MHz,  $\text{DMSO-}d_6$ )  $\delta$  8.68 (d,  $J = 2.5$  Hz, 1H), 8.35 (dd,  $J = 9.0, 2.0$  Hz, 1H), 8.26-8.24 (m, 2H), 8.06 (d,  $J = 9.0$  Hz, 1H), 7.71-7.65 (m, 3H).

**$^{13}\text{C}$  NMR** (125 MHz,  $\text{CDCl}_3$ )  $\delta$  165.4, 154.0, 145.1, 141.9, 132.9, 129.5, 127.8, 125.5, 121.5, 121.4, 115.8, 115.7, 111.8.

**GC-MS** (EI, 70 eV)  $m/z$  240 ( $[\text{M}]^+$ ).

### 5-Nitro-2-(*p*-tolyl)benzoxazole (20)<sup>9</sup>

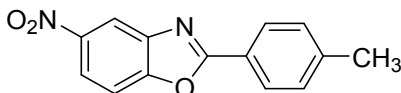

**Melting point:** 125-126 °C.

**FT-IR** (KBr, 4000-400  $\text{cm}^{-1}$ ) 2923, 2850, 1695, 1628, 1515, 1416, 1328, 1250.

**$^1\text{H}$  NMR** (500 MHz, acetone- $d_6$ )  $\delta$  8.31-8.27 (m, 2H), 7.57-7.55 (m, 2H), 7.40-7.35 (m, 2H), 7.24 (d,  $J = 9.0$  Hz, 1H), 2.47 (s, 3H).

**$^{13}\text{C}$  NMR** (125 MHz, acetone- $d_6$ )  $\delta$  166.7, 164.7, 150.0, 143.3, 135.5, 130.8, 130.7, 127.3, 124.8, 120.7, 117.2, 117.0, 110.9, 21.4.

**GC-MS** (EI, 70 eV)  $m/z$  254 ( $[\text{M}]^+$ ).

### 5-Nitro-2-(4-*tert*-butylphenyl)benzoxazole (21)<sup>10</sup>

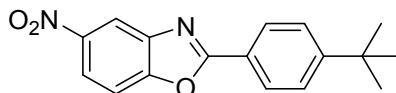

**Melting point:** 136-137 °C.

**FT-IR** (KBr, 4000-400  $\text{cm}^{-1}$ ) 3106, 2964, 2869, 1724, 1619, 1531, 1496, 1462, 1343, 1267.

**$^1\text{H}$  NMR** (500 MHz, acetone- $d_6$ )  $\delta$  8.18-8.16 (m, 2H), 7.66-7.63 (m, 2H), 7.56-7.54 (m, 2H), 7.23-7.21 (m, 1H), 1.38 (s, 9H).

**$^{13}\text{C}$  NMR** (125 MHz, acetone- $d_6$ )  $\delta$  166.9, 157.3, 155.3, 146.4, 143.6, 132.1, 129.7, 128.7, 127.2, 124.2, 122.0, 116.4, 112.1, 35.8, 31.4.

GC-MS (EI, 70 eV)  $m/z$  296 ( $[M]^+$ ).

**5-Nitro-2-(4-chlorophenyl)benzoxazole (22)**<sup>7</sup>

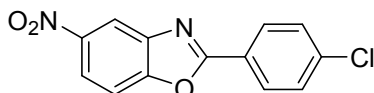

**Melting point:** 215-217 °C.

**FT-IR** (KBr, 4000-400  $\text{cm}^{-1}$ ) 3105, 2924, 2854, 1615, 1528, 1481, 1346, 1257, 1088.

**<sup>1</sup>H NMR** (500 MHz, acetone- $d_6$ )  $\delta$  8.63 (d,  $J = 2.0$  Hz, 1H), 8.39 (dd,  $J = 9.0, 2.0$  Hz, 1H), 8.32-8.29 (m, 2H), 7.98 (d,  $J = 9.0$  Hz, 1H), 7.71-7.70 (m, 2H).

**<sup>13</sup>C NMR** (125 MHz, acetone- $d_6$ )  $\delta$  155.4, 130.5, 130.4, 130.3, 129.7, 125.9, 122.4, 116.7, 112.4.

GC-MS (EI, 70 eV)  $m/z$  274.5 ( $[M]^+$ ).

**2-Phenylbenzothiazole (23)**<sup>11</sup>

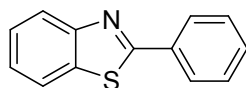

**Melting point:** 111-113 °C

**FT-IR** (KBr, 4000-400  $\text{cm}^{-1}$ ) 3063, 1631, 1476, 1452, 1311, 1223.

**<sup>1</sup>H NMR** (500 MHz,  $\text{CDCl}_3$ )  $\delta$  8.12-8.08 (m, 3H), 7.91 (d,  $J = 8.0$  Hz, 1H), 7.51-7.48 (m, 4H), 7.41-7.37 (m, 1H).

**<sup>13</sup>C NMR** (125 MHz,  $\text{CDCl}_3$ )  $\delta$  168.2, 154.3, 135.2, 133.8, 131.1, 129.2, 127.7, 126.5, 125.3, 123.4, 121.8.

GC-MS (EI, 70 eV)  $m/z$  211 ( $[M]^+$ ).

**2-(*p*-Tolyl)benzothiazole (24)**<sup>11</sup>

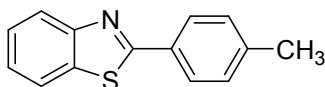

**Melting point:** 85-86 °C

**FT-IR** (KBr, 4000-400  $\text{cm}^{-1}$ ) 2920, 2855, 1605, 1477, 1308, 1216.

**<sup>1</sup>H NMR** (500 MHz, CDCl<sub>3</sub>) δ 8.07 (d, *J* = 8.5 Hz, 1H), 7.99 (d, *J* = 8.0 Hz, 2H), 7.88 (d, *J* = 8.0, 0.5 Hz, 1H), 7.50 (td, *J* = 7.0, 1.0, 1H), 7.36 (td, *J* = 7.0, 1.0, 1H), 7.29 (d, *J* = 8.0 Hz, 2H), 2.42 (s, 3H).

**<sup>13</sup>C NMR** (125 MHz, CDCl<sub>3</sub>) δ 168.3, 154.3, 141.5, 135.1, 131.1, 129.8, 127.6, 126.4, 125.1, 123.2, 121.7, 21.6.

**GC-MS** (EI, 70 eV) *m/z* 225 ([M]<sup>+</sup>).

### 2-(4-Methoxyphenyl)benzothiazole (25)<sup>11</sup>

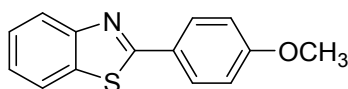

**Melting point:** 121-122 °C

**FT-IR** (KBr, 4000-400 cm<sup>-1</sup>) 2917, 1599, 1478, 1518, 1479, 1308, 1256.

**<sup>1</sup>H NMR** (500 MHz, CDCl<sub>3</sub>) δ 8.05-8.02 (m, 3H), 7.88 (d, *J* = 8.0 Hz, 1H), 7.47 (td, *J* = 8.0, 1.0 Hz, 1H), 7.35 (td, *J* = 8.0, 1.0 Hz, 1H), 7.02-6.99 (m, 2H), 3.89 (s, 3H).

**<sup>13</sup>C NMR** (125 MHz, CDCl<sub>3</sub>) δ 168.0, 162.1, 154.3, 135.0, 129.3, 126.6, 126.4, 125.0, 123.0, 121.7, 114.5, 55.6.

**GC-MS** (EI, 70 eV) *m/z* 241 ([M]<sup>+</sup>).

### 2-Phenylbenzimidazole (26)<sup>12</sup>

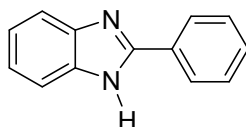

**Melting point:** 293-294 °C

**FT-IR** (KBr, 4000-400 cm<sup>-1</sup>) 3411, 1540, 1450, 1408, 967, 774.

**<sup>1</sup>H NMR** (500 MHz, DMSO-*d*<sub>6</sub>) δ 8.18 (d, *J* = 7.5 Hz, 1H), 7.60 (s, 1H), 7.57-7.55 (m, 2H), 7.51-7.48 (m, 1H), 7.22-7.19 (m, 2H).

**<sup>13</sup>C NMR** (125 MHz, DMSO-*d*<sub>6</sub>) δ 151.2, 130.2, 129.8, 128.9, 126.4, 122.1.

**GC-MS** (EI, 70 eV) *m/z* 195 ([M]<sup>+</sup>).

**2-(4-Methoxyphenyl)benzimidazole (27)**<sup>12</sup>

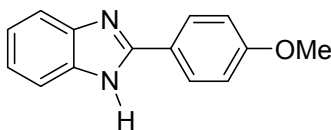

**Melting point:** 204 °C

**FT-IR** (KBr, 4000-400 cm<sup>-1</sup>): 3395, 3055, 1452, 1406, 1274, 741.

**<sup>1</sup>H NMR** (500 MHz, DMSO-*d*<sub>6</sub>): δ 8.49 (s, 1H), 8.05 (d, *J* = 7.5 Hz, 1H), 7.88 (d, *J* = 9Hz, 2H), 7.81 (d, *J* = 8.0 Hz, 1H), 7.47-7.41 (m, 2H), 7.17 (d, *J* = 8.5 Hz, 2H), 3.90 (s, 3H) ppm.

**<sup>13</sup>C NMR** (125 MHz, DMSO-*d*<sub>6</sub>): δ 166.4, 163.2, 144.3, 143.7, 132.4, 132.1, 131.6, 125.1, 124.7, 124.5, 120.1, 115.0, 114.4, 55.7 ppm.

**GC-MS** (EI, 70 eV) *m/z* 225 ([M]<sup>+</sup>).

**2-(4-Fluorophenyl)benzimidazole (28)**<sup>12</sup>

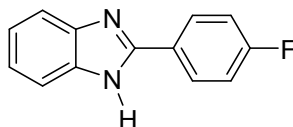

**Melting point:** 253-254 °C

**FT-IR** (KBr, 4000-400 cm<sup>-1</sup>) 3429, 3060, 1604, 1440, 964, 743.

**<sup>1</sup>H NMR** (500 MHz, DMSO-*d*<sub>6</sub>) δ 8.23-8.21 (m, 2H), 7.59-7.58 (m, 2H), 7.42-7.38 (m, 2H), 7.22-7.18 (m, 2H) ppm.

**<sup>13</sup>C NMR** (125 MHz, DMSO-*d*<sub>6</sub>) δ 163.0 (d, *J* = 245.0 Hz), 150.4, 131.3, 128.7 (d, *J* = 8.75 Hz), 126.8, 122.1, 116.0, 115.9 ppm.

**GC-MS** (EI, 70 eV) *m/z* 213 ([M]<sup>+</sup>).

### Section S3. $^1\text{H}$ , $^{13}\text{C}$ NMR spectroscopy

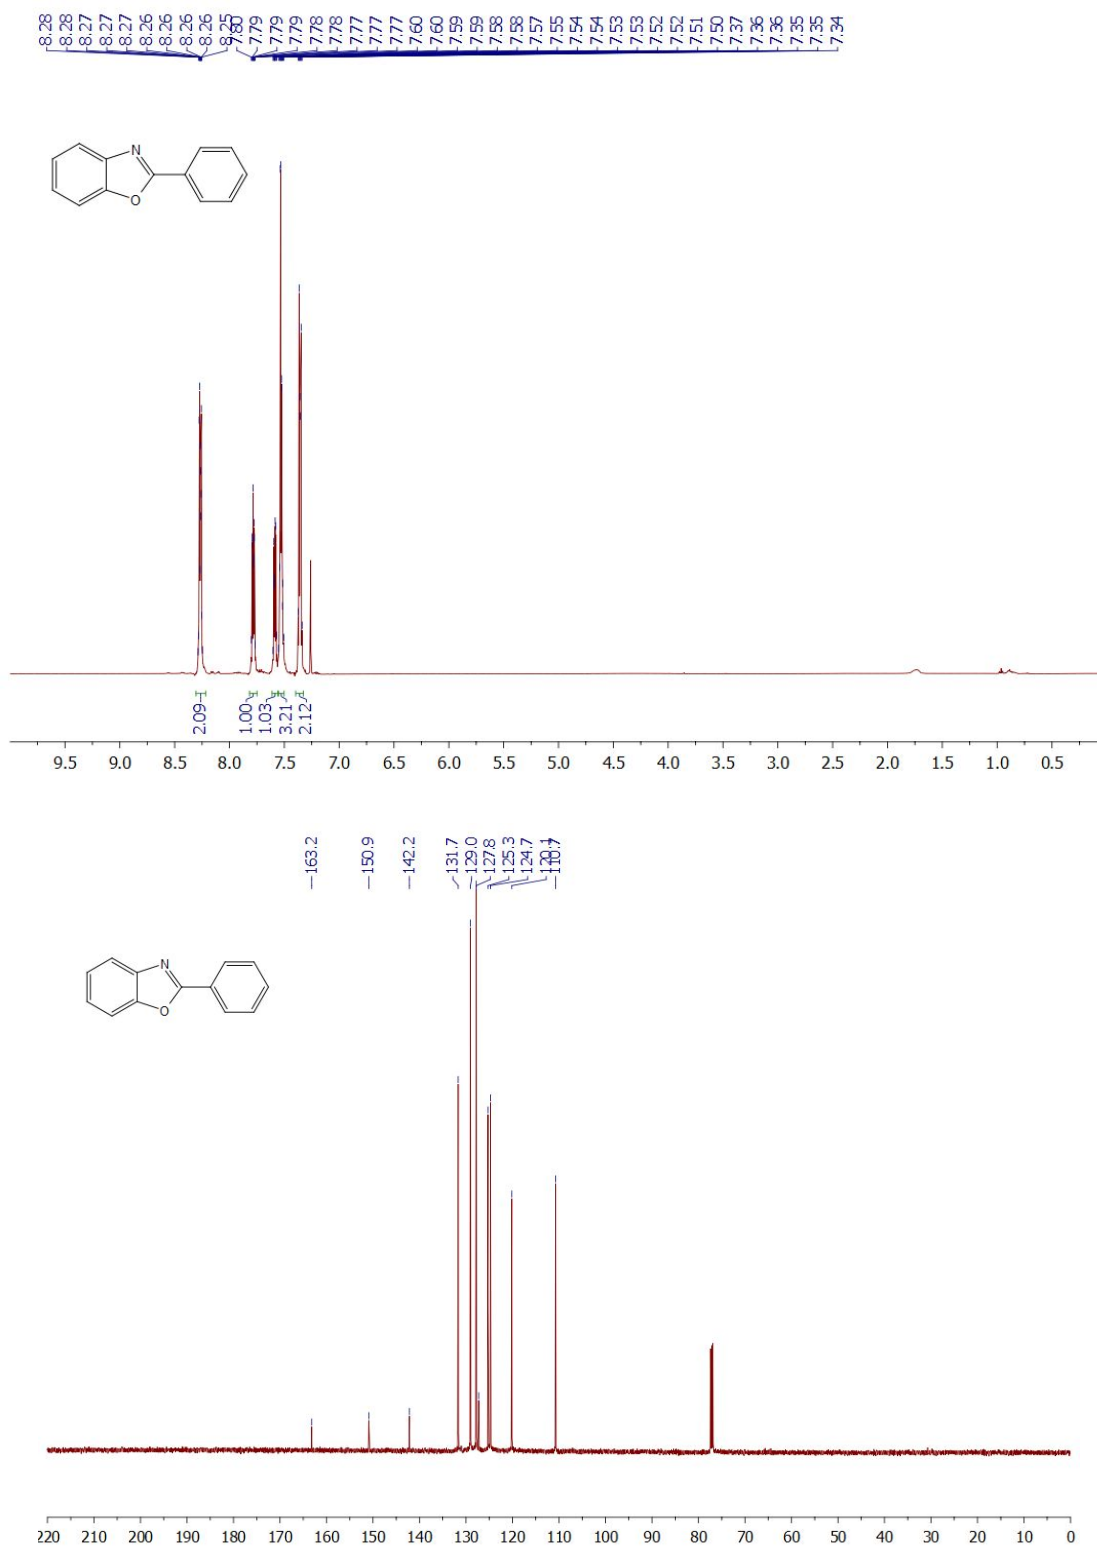

**Figure S5.**  $^1\text{H}$  (top) and  $^{13}\text{C}$  (bottom) NMR spectra of 2-phenylbenzoxazole (1).



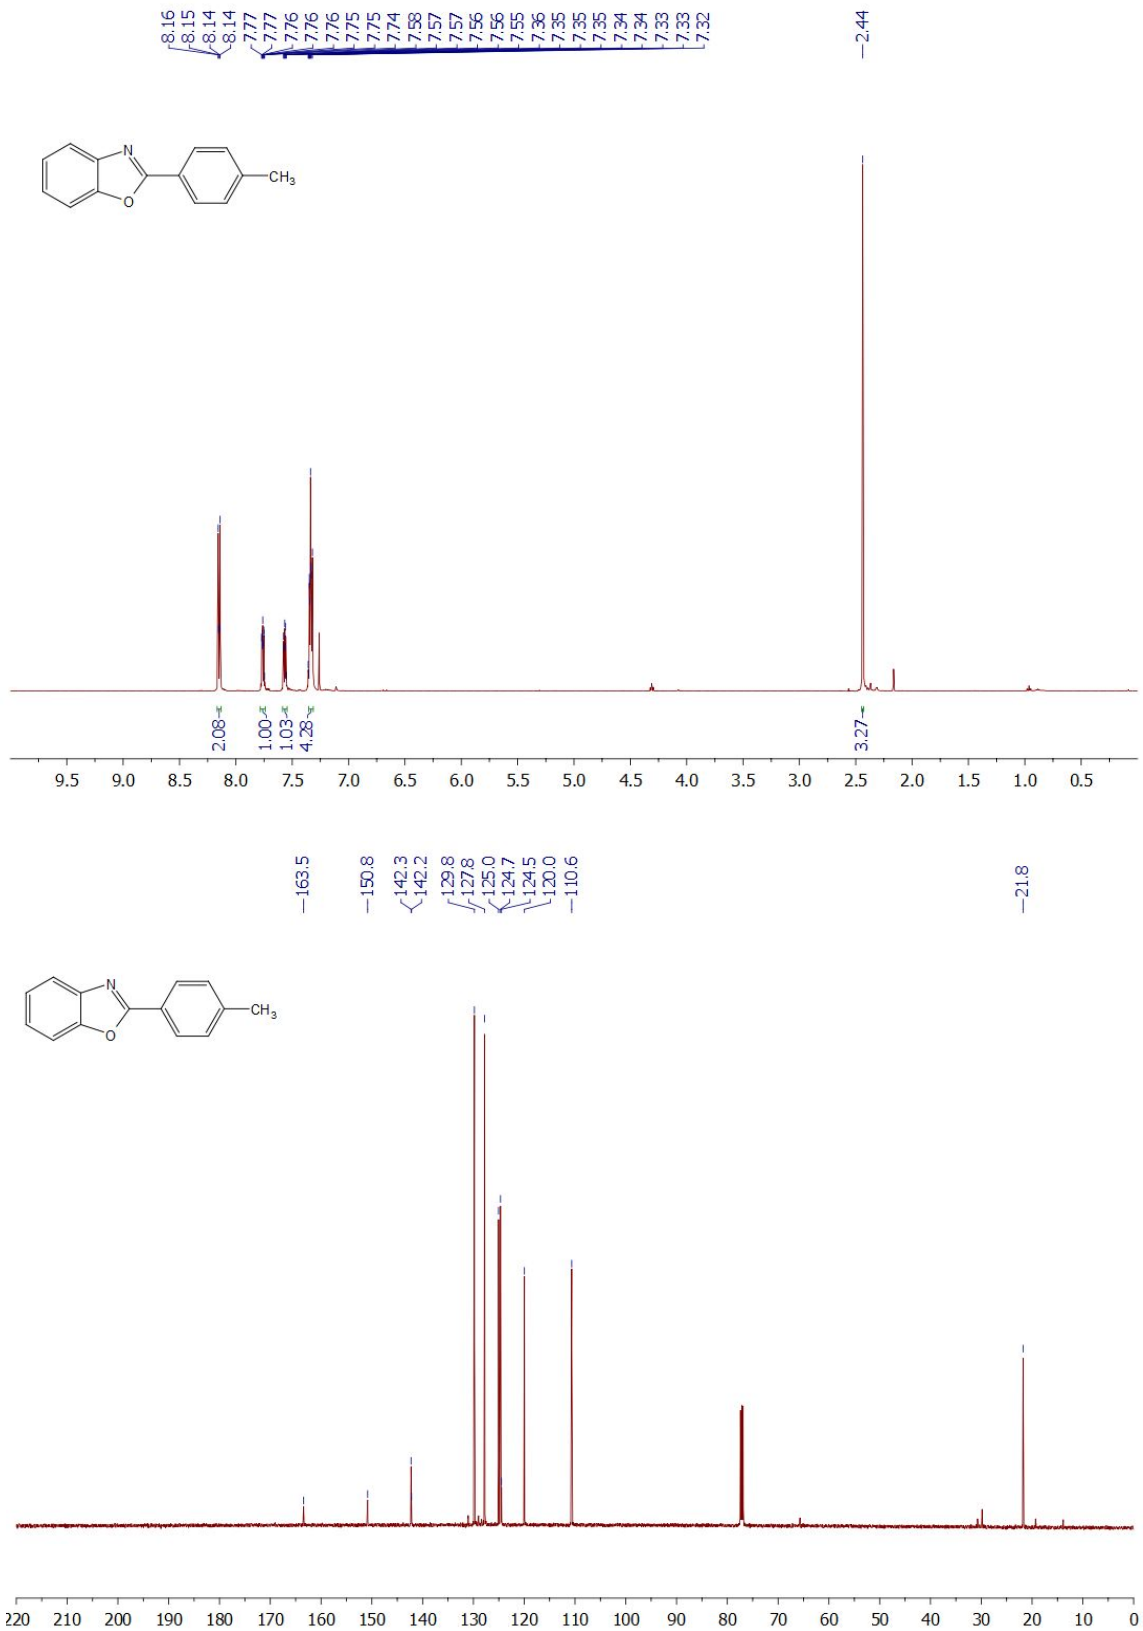

**Figure S6.** <sup>1</sup>H (top) and <sup>13</sup>C (bottom) NMR spectra of 2-(*p*-tolyl)benzoxazole (2).

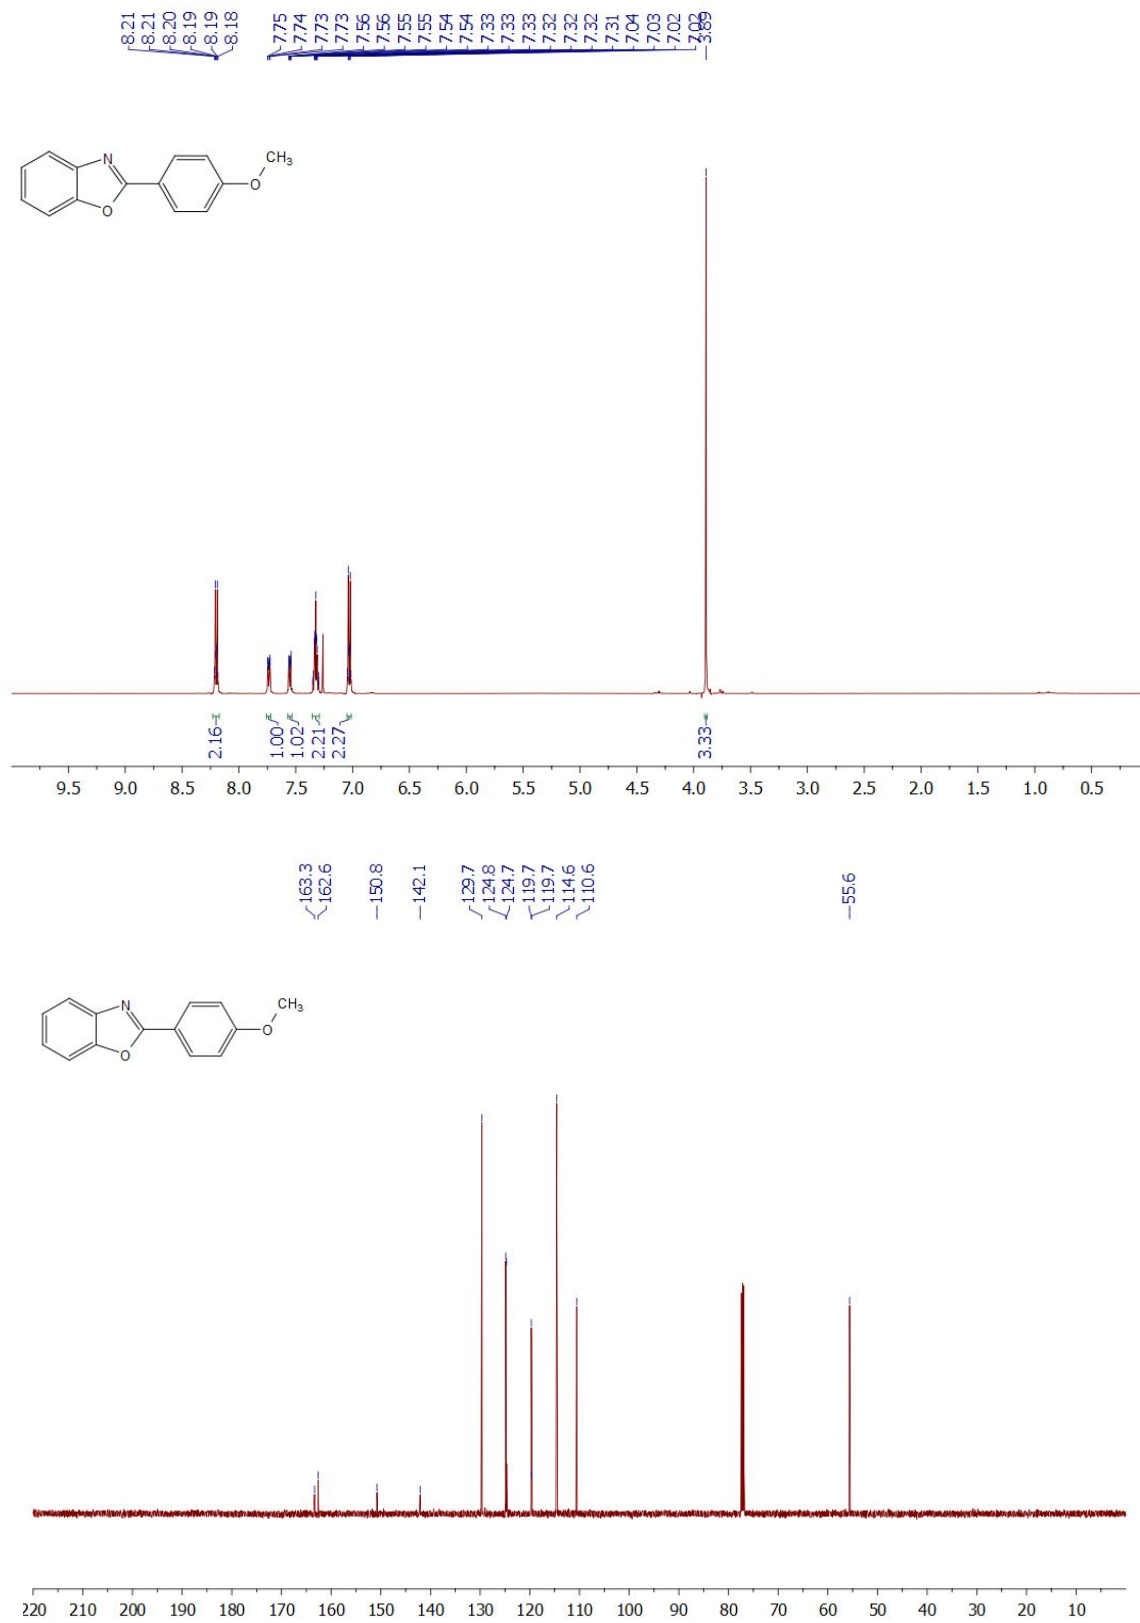

**Figure S7.** <sup>1</sup>H (top) and <sup>13</sup>C (bottom) NMR spectra of 2-(4-methoxyphenyl)benzoxazole (3).

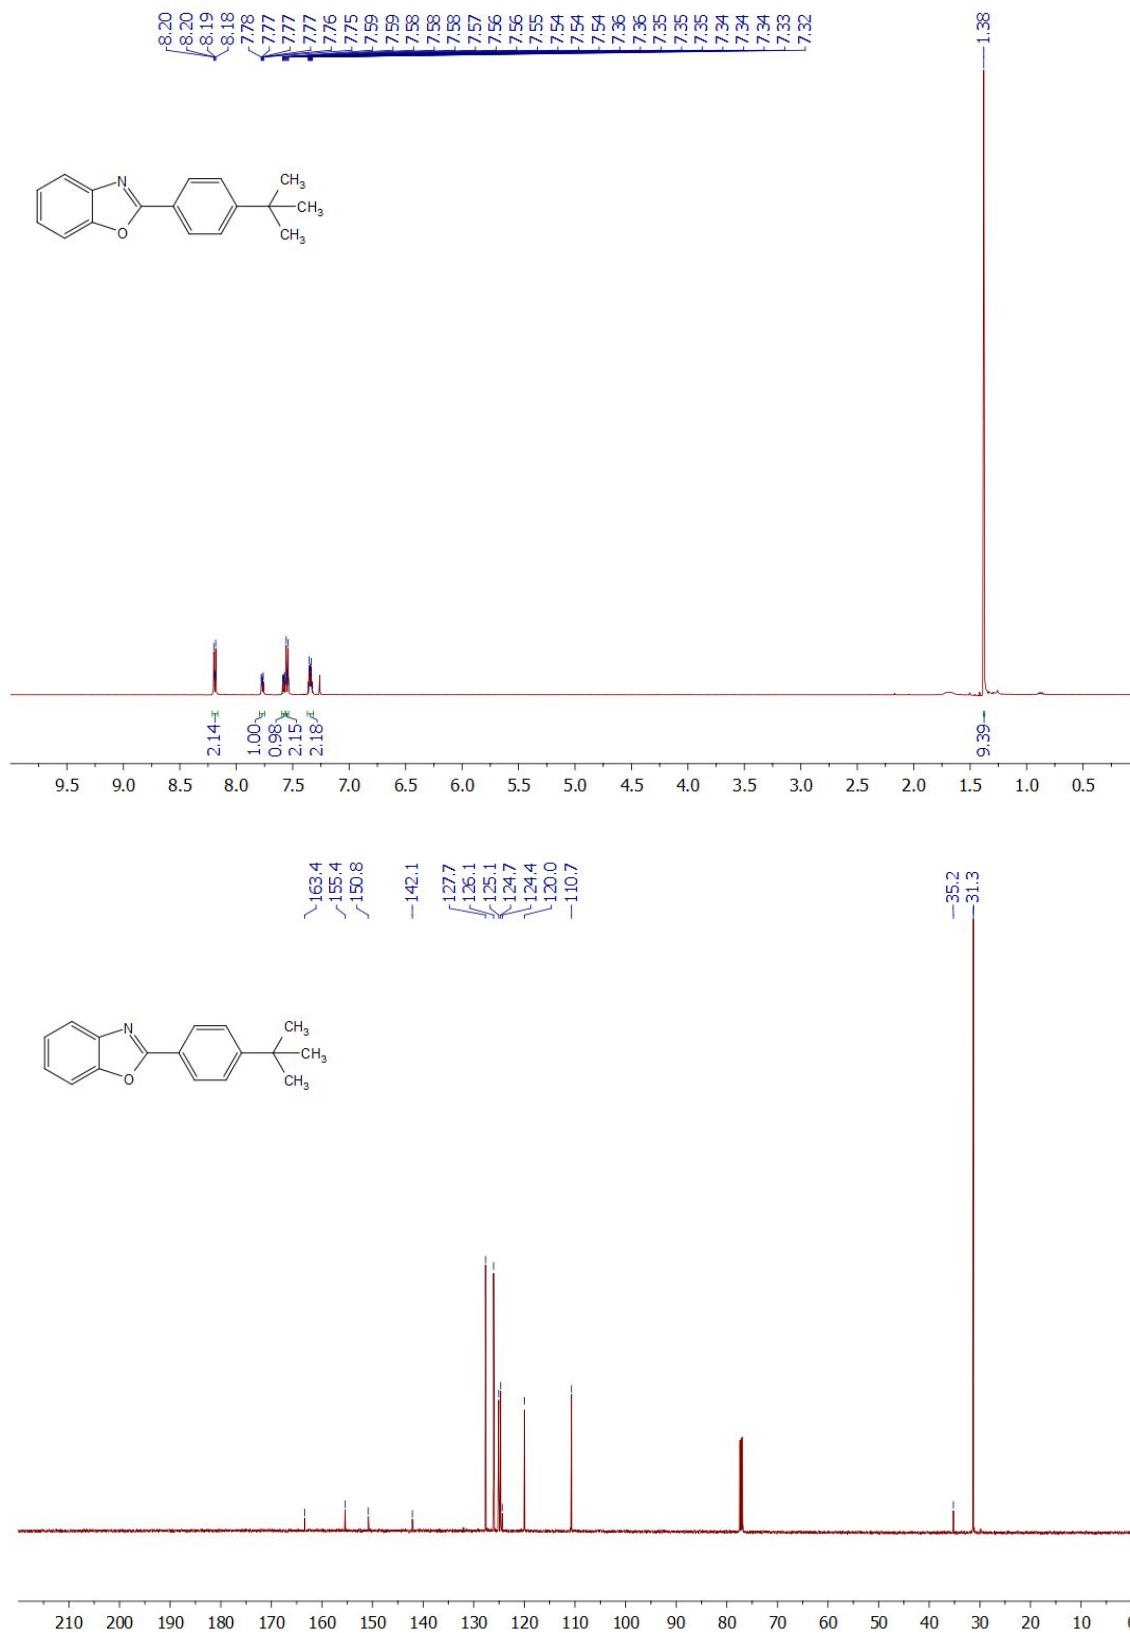

**Figure S8.** <sup>1</sup>H (top) and <sup>13</sup>C (bottom) NMR spectra of 2-(4-*tert*-butylphenyl)benzoxazole (4).

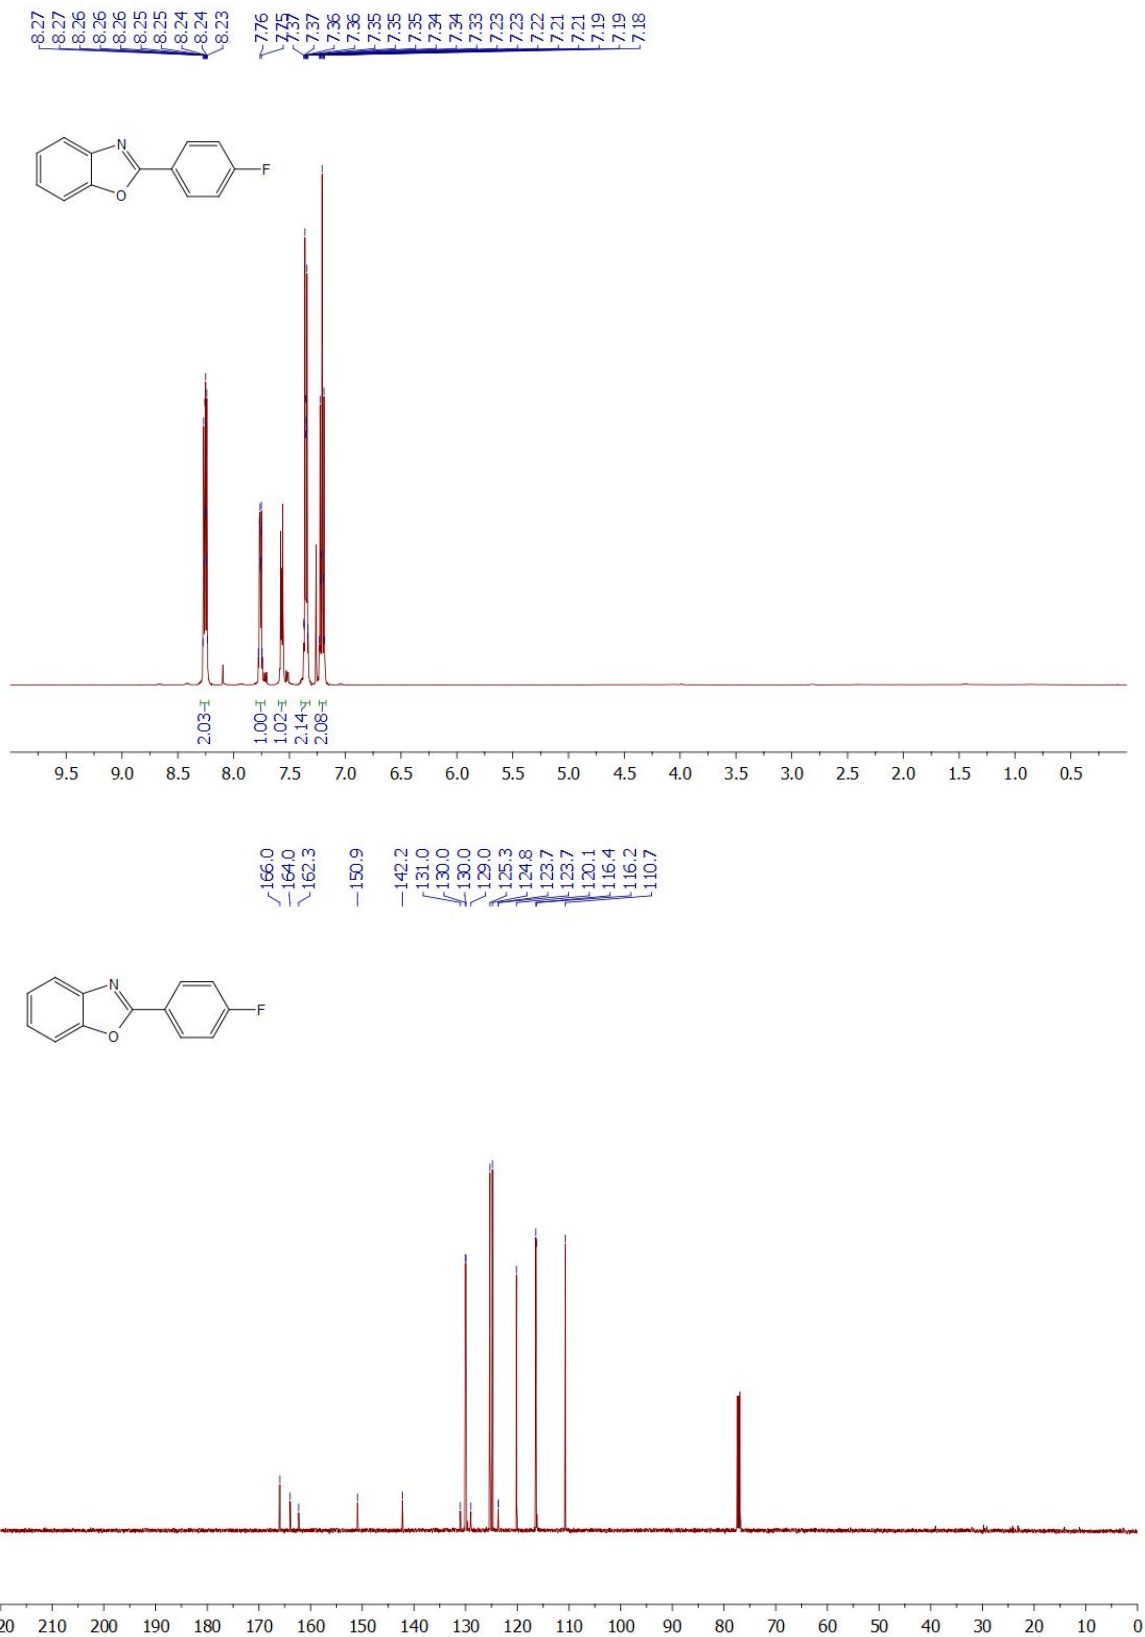

**Figure S9.** <sup>1</sup>H (top) and <sup>13</sup>C (bottom) NMR spectra of 2-(4-fluorophenyl)benzoxazole (5).

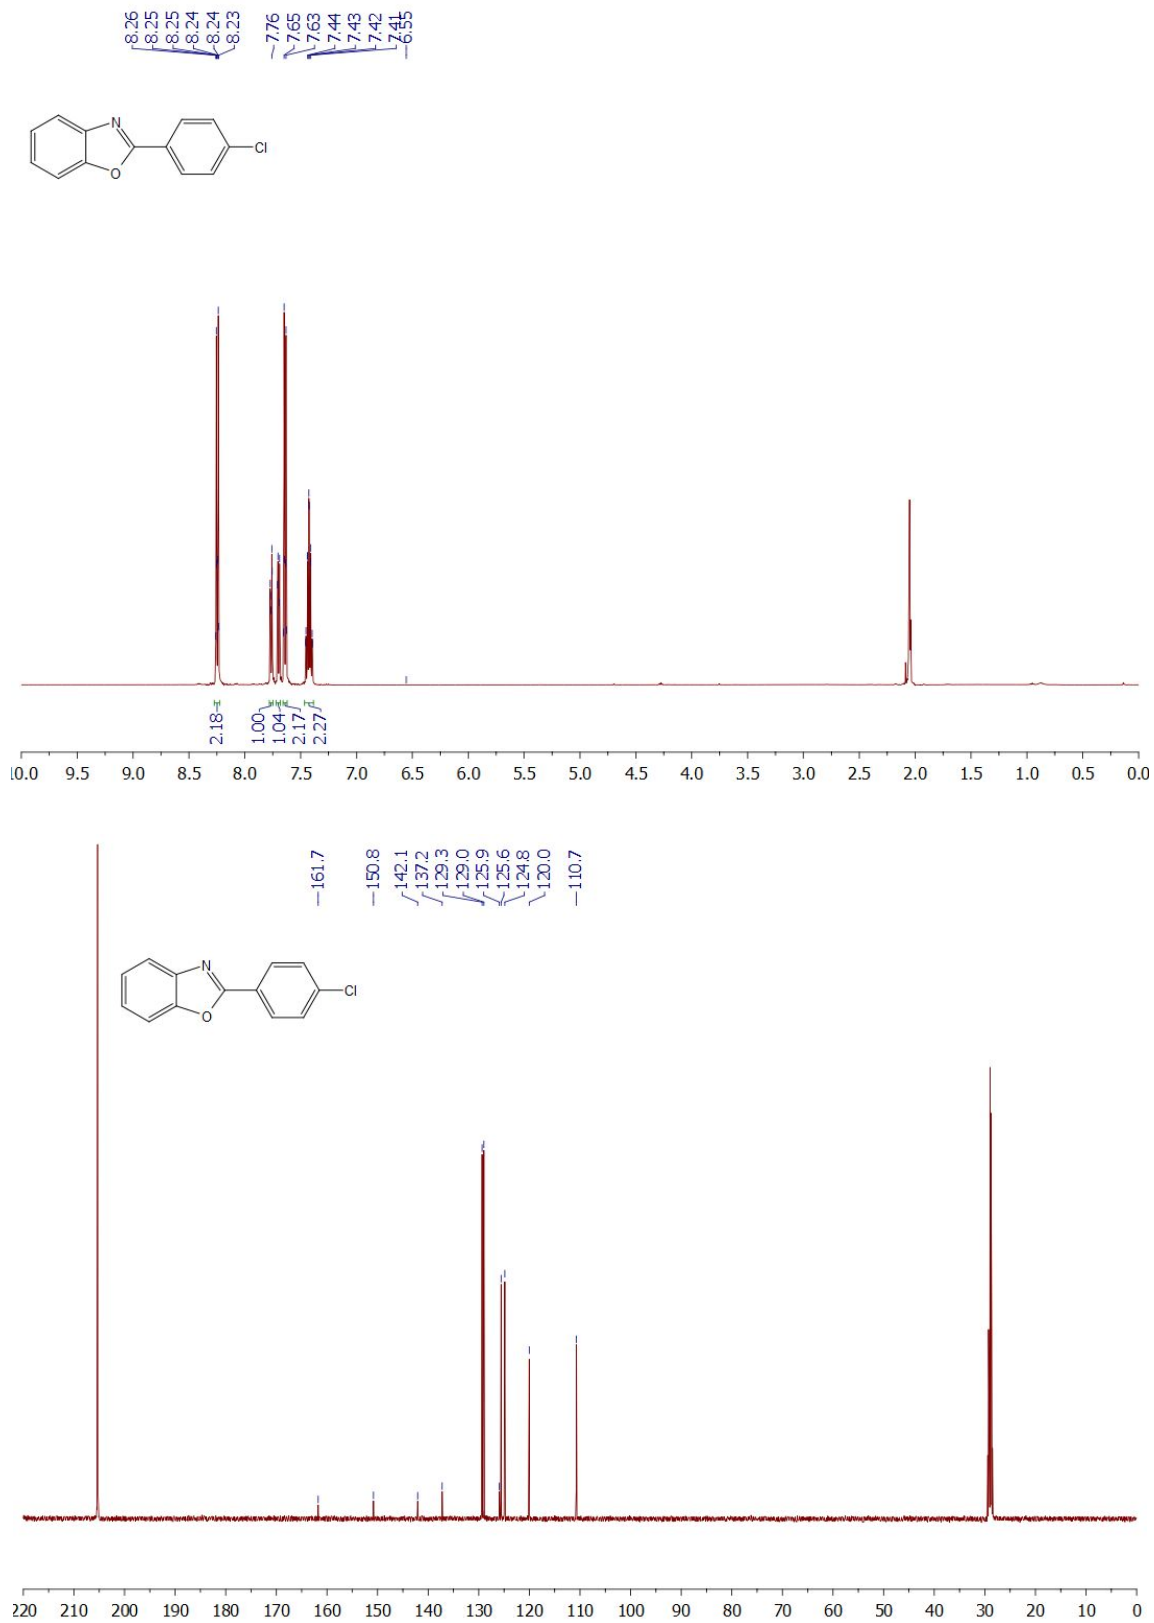

**Figure S10.** <sup>1</sup>H (top) and <sup>13</sup>C (bottom) NMR spectra of 2-(4-chlorophenyl)benzoxazole (6).

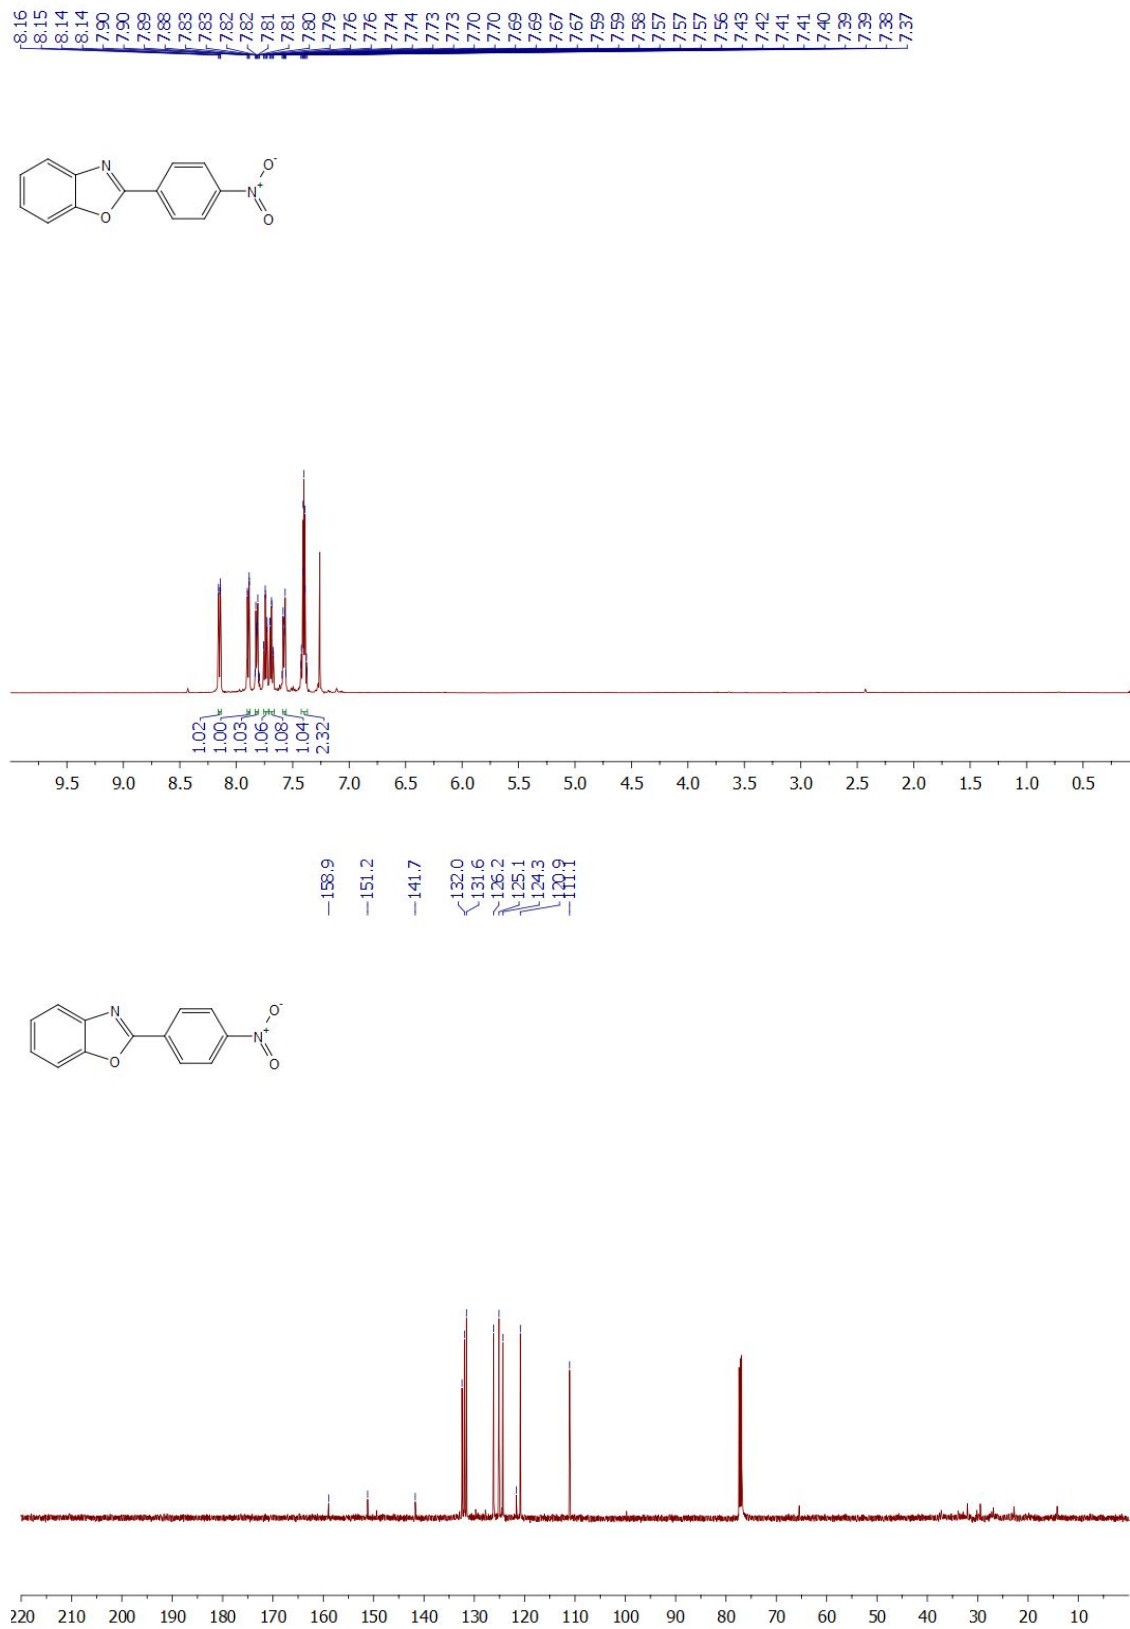

**Figure S11.** <sup>1</sup>H (top) and <sup>13</sup>C (bottom) NMR spectra of 2-(4-nitrophenyl)benzoxazole (7).

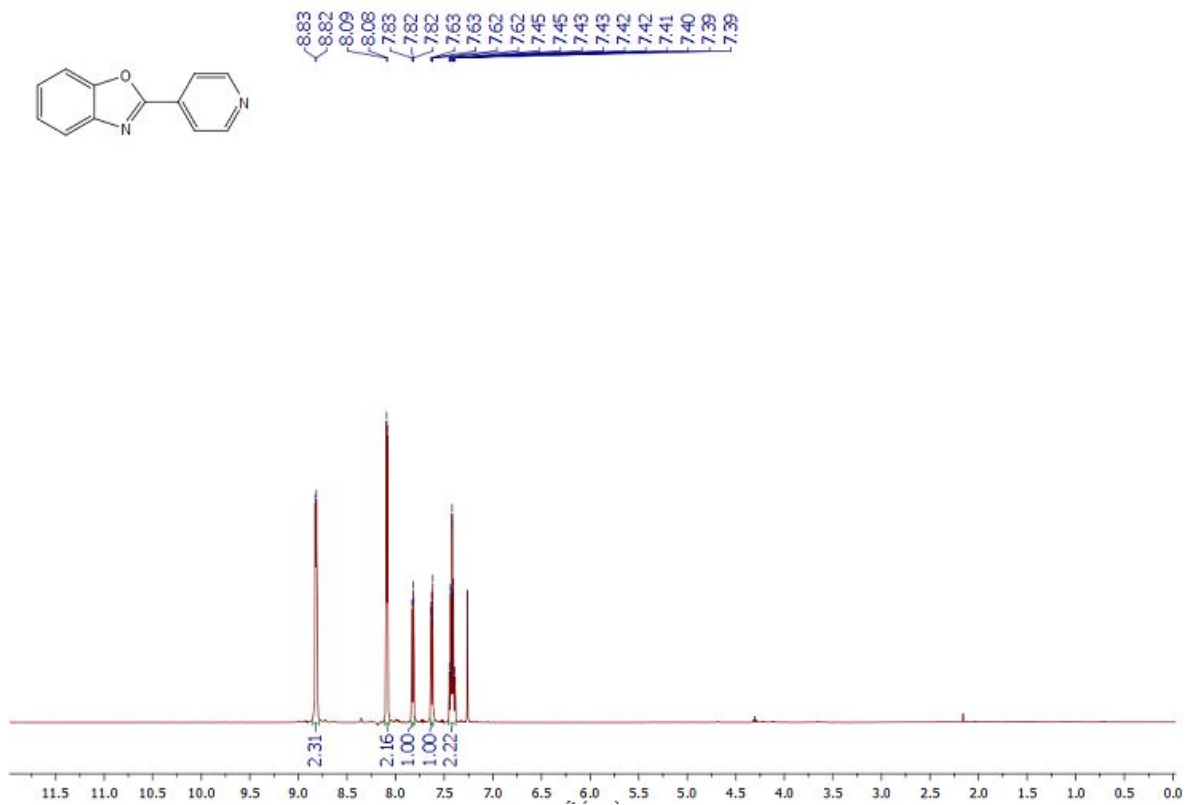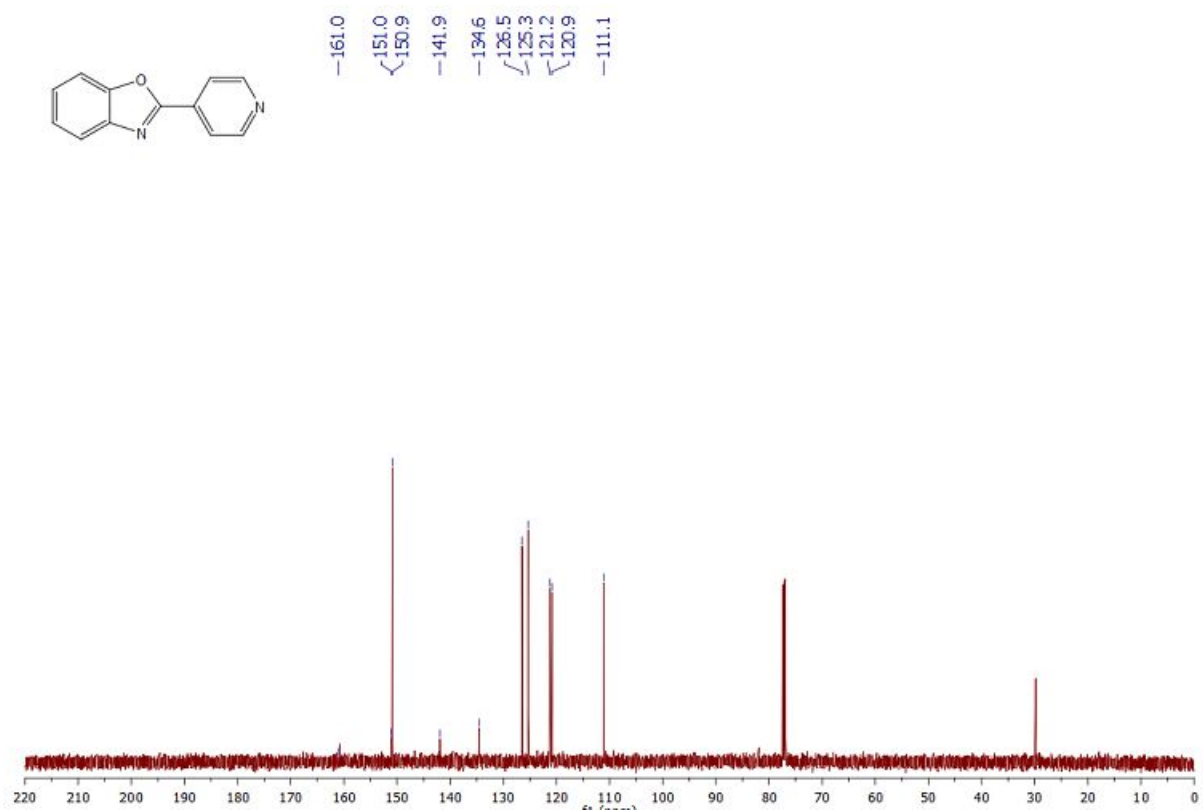

**Figure S12.** <sup>1</sup>H (top) and <sup>13</sup>C (bottom) NMR spectra of 2-(pyridin-4-yl)benzoxazole (8).

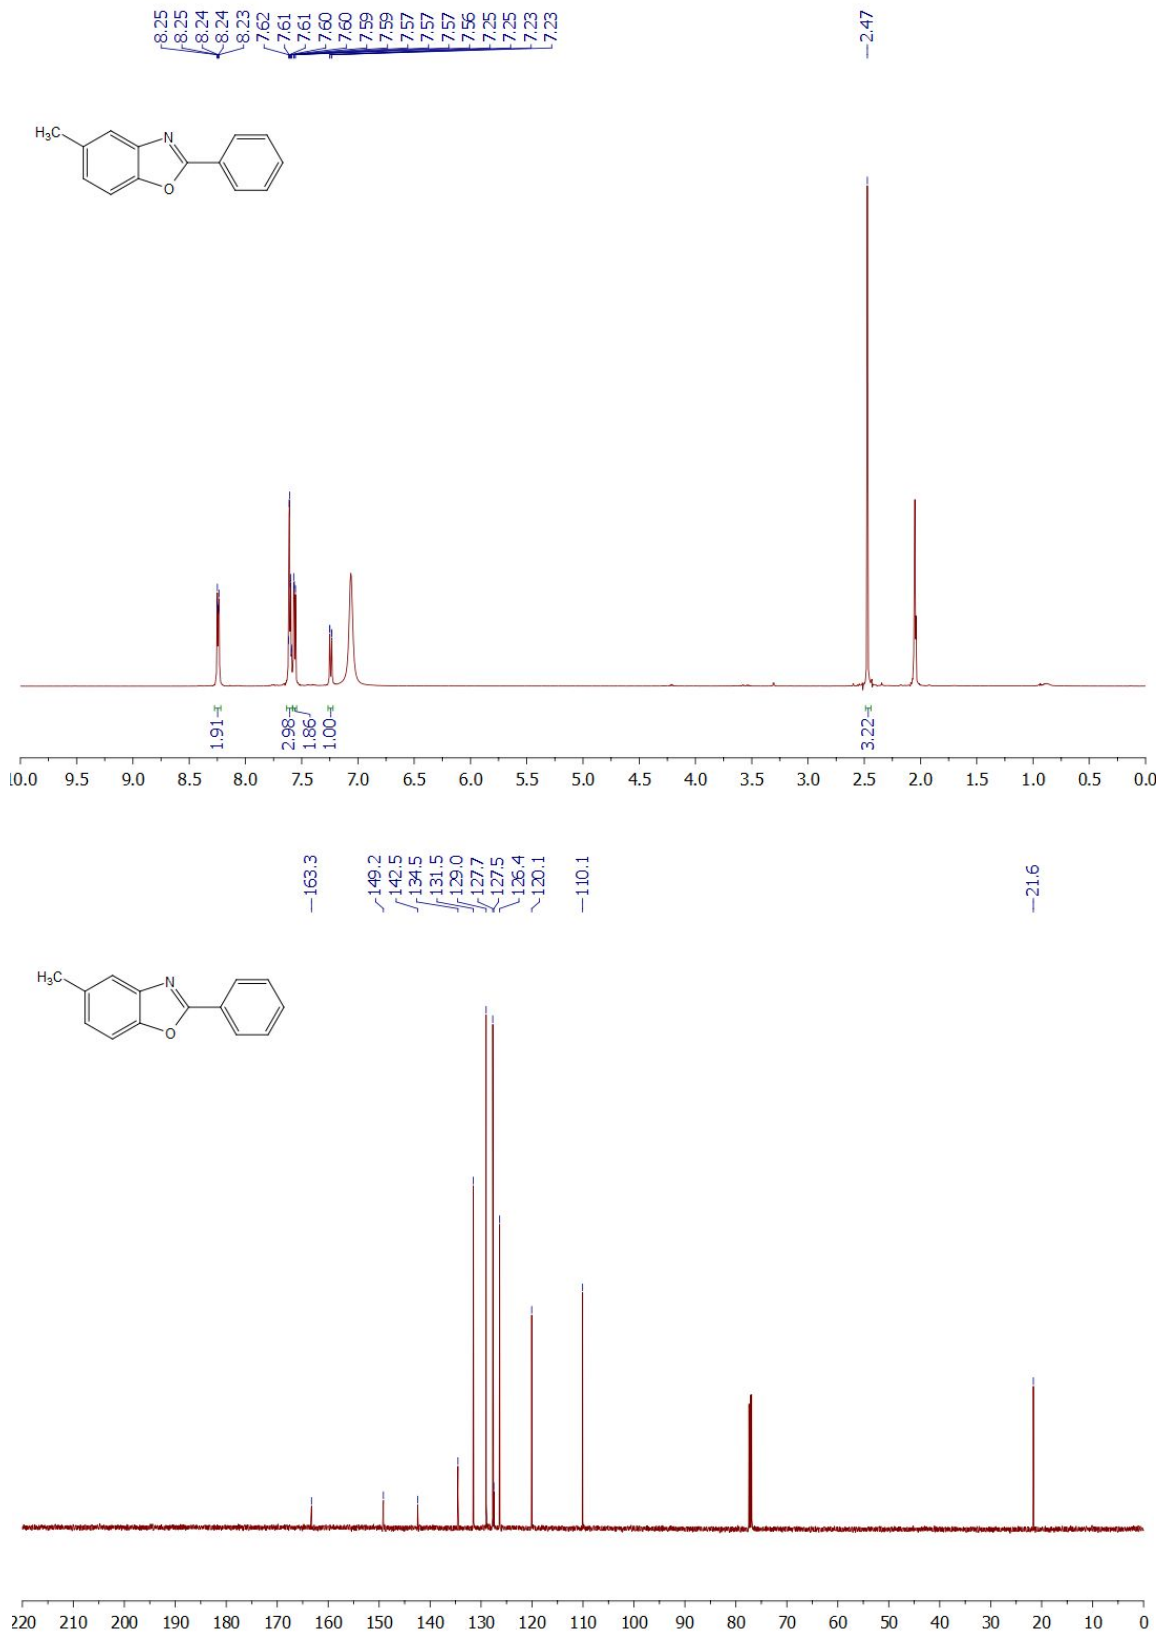

**Figure S13.** <sup>1</sup>H (top) and <sup>13</sup>C (bottom) NMR spectra of 5-methyl-2-phenylbenzoxazole (9).



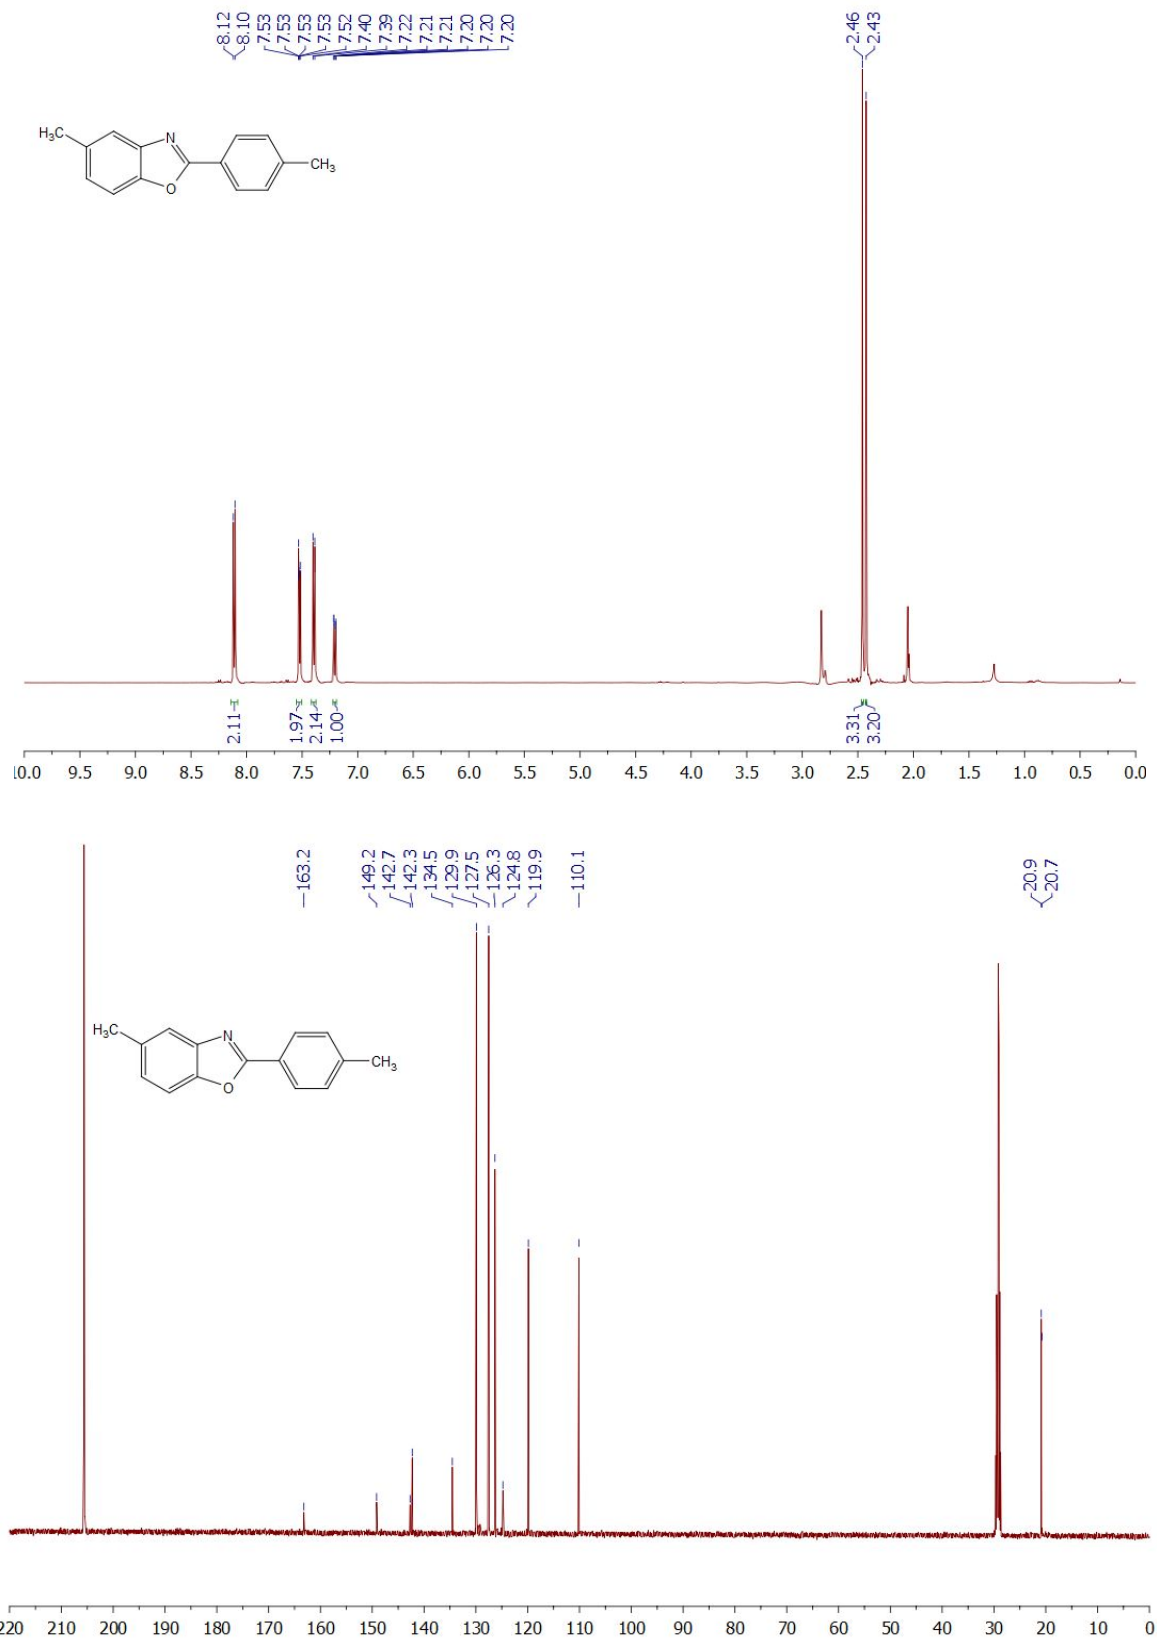

**Figure S14.** <sup>1</sup>H (top) and <sup>13</sup>C (bottom) NMR spectra of 5-methyl-2-(*p*-tolyl)benzoxazole (10).

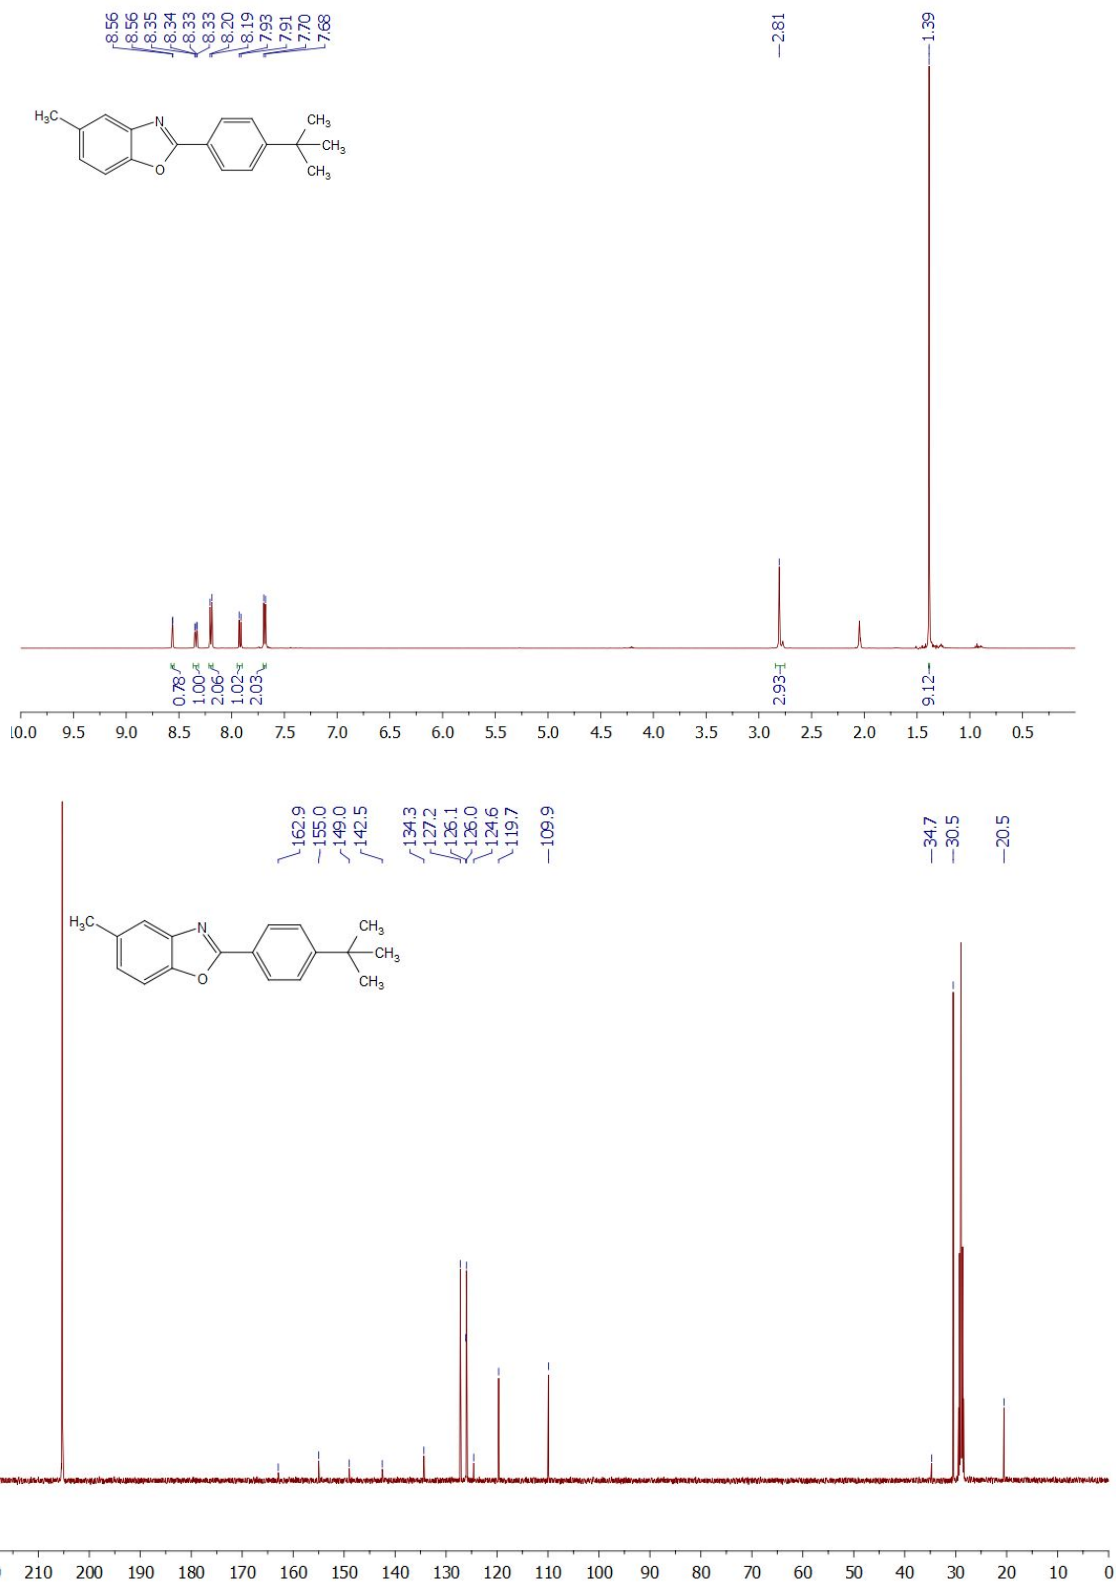

**Figure S15.** <sup>1</sup>H (top) and <sup>13</sup>C (bottom) NMR spectra of 5-methyl-2-(4-*tert*-butylphenyl)benzoxazole (11).

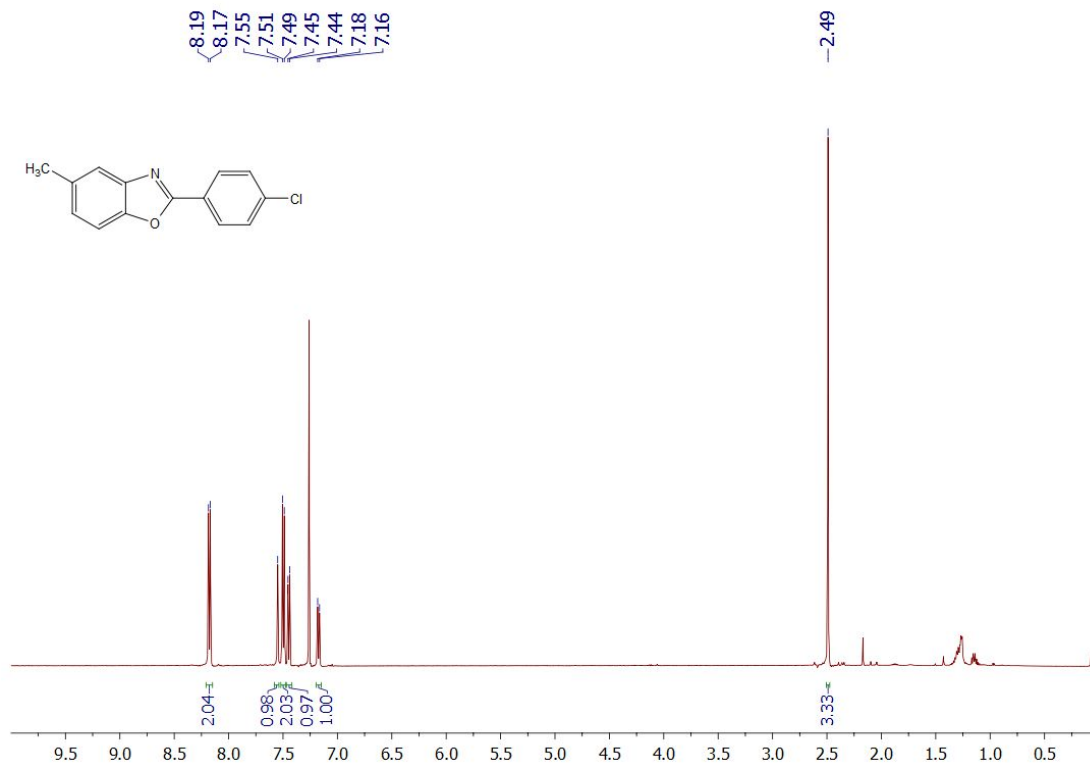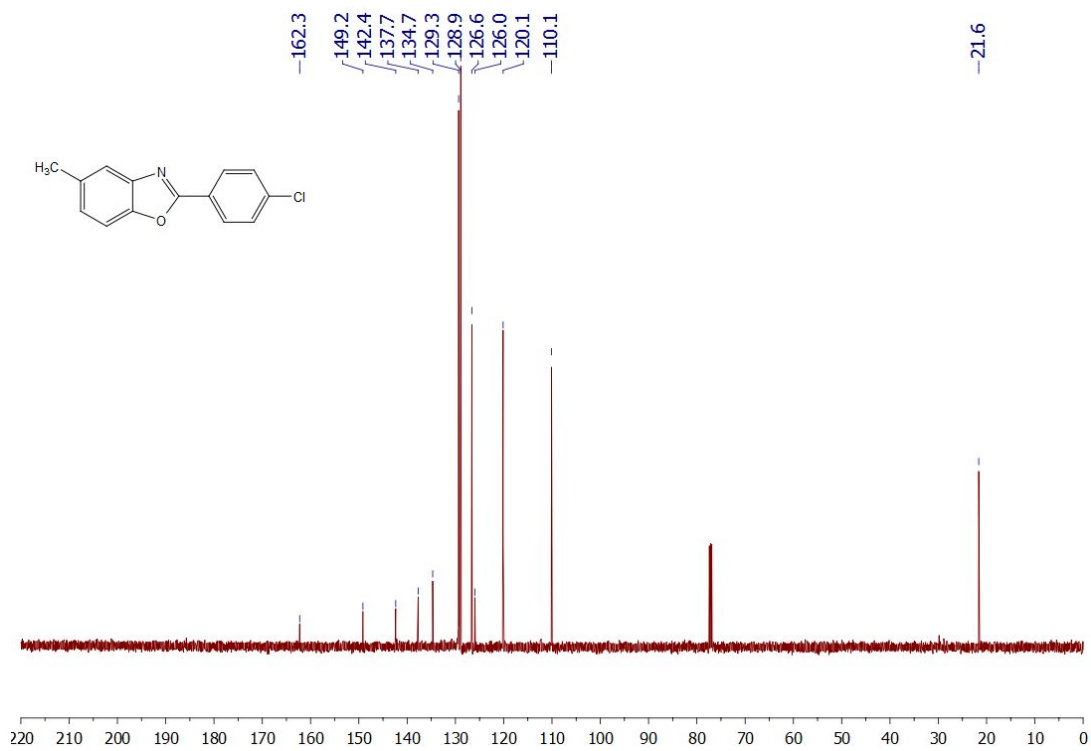

**Figure S16.** <sup>1</sup>H (top) and <sup>13</sup>C (bottom) NMR spectra of 5-methyl-2-(4-chlorophenyl)benzoxazole (12).

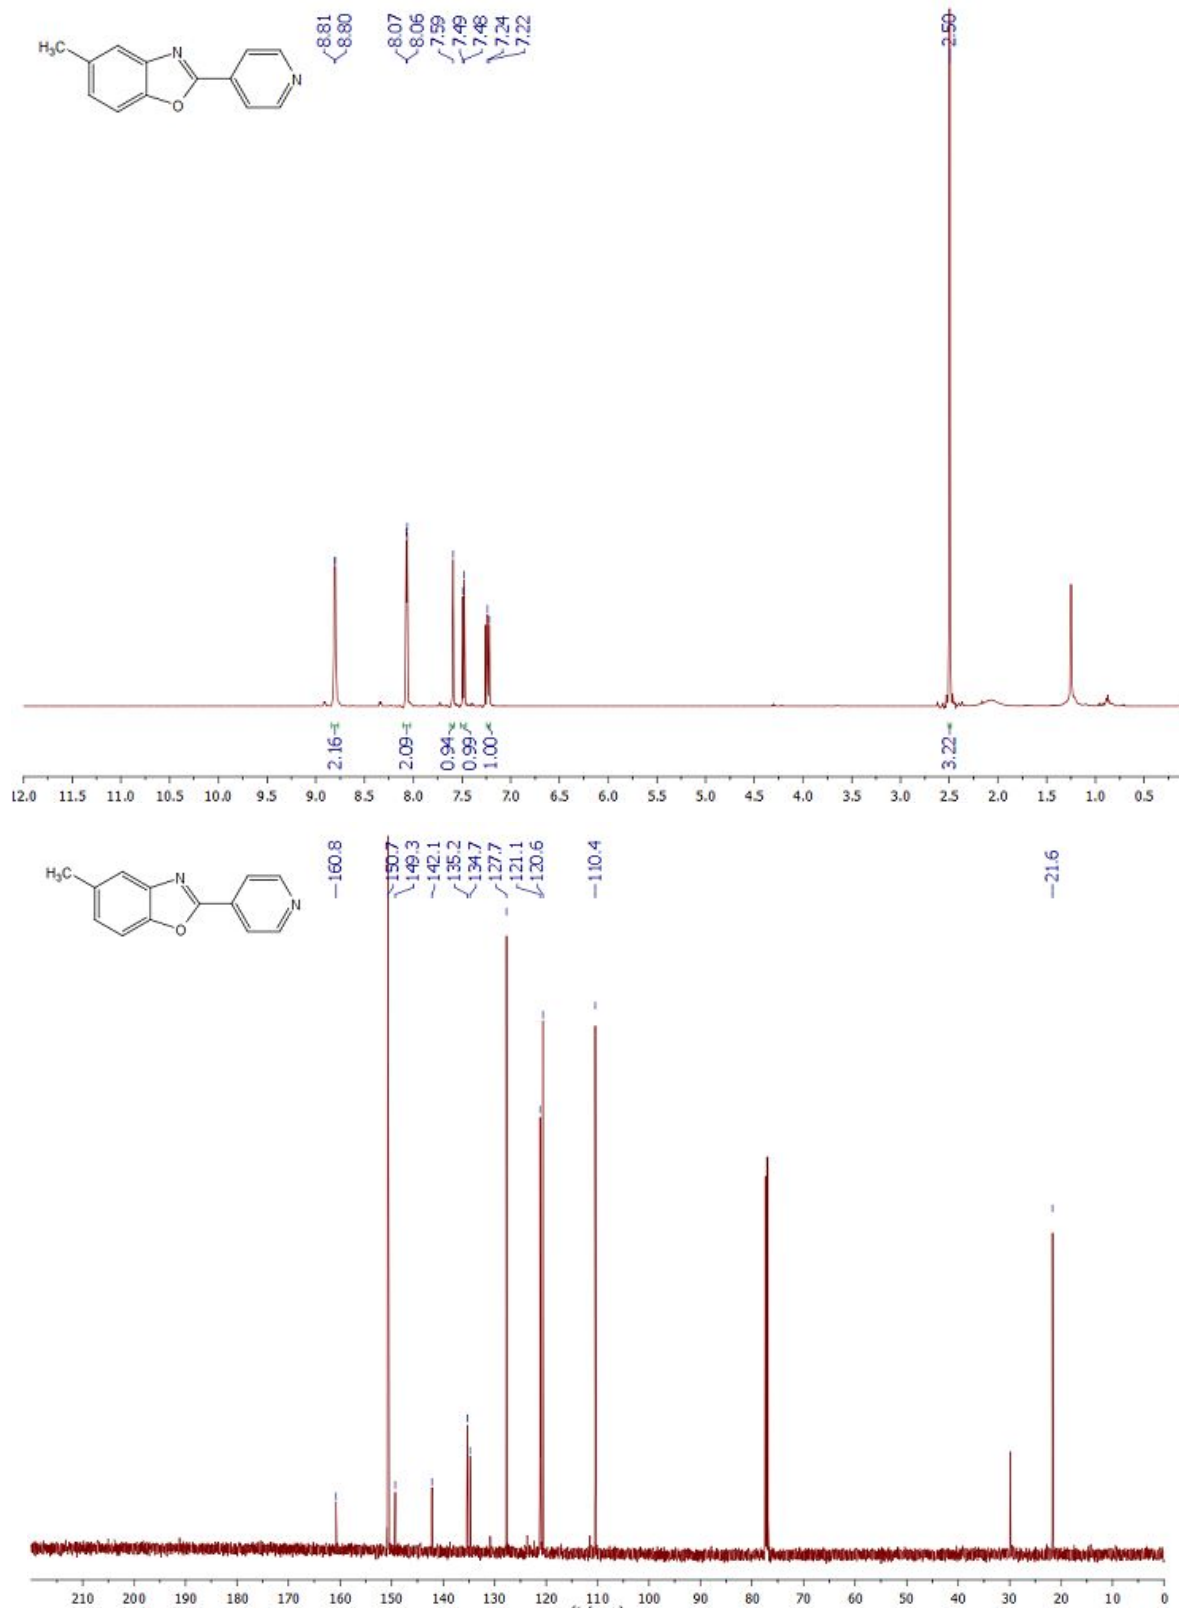

**Figure S17.** <sup>1</sup>H (top) and <sup>13</sup>C (bottom) NMR spectra of 5-methyl-2-(pyridin-4-yl)benzoxazole (13).

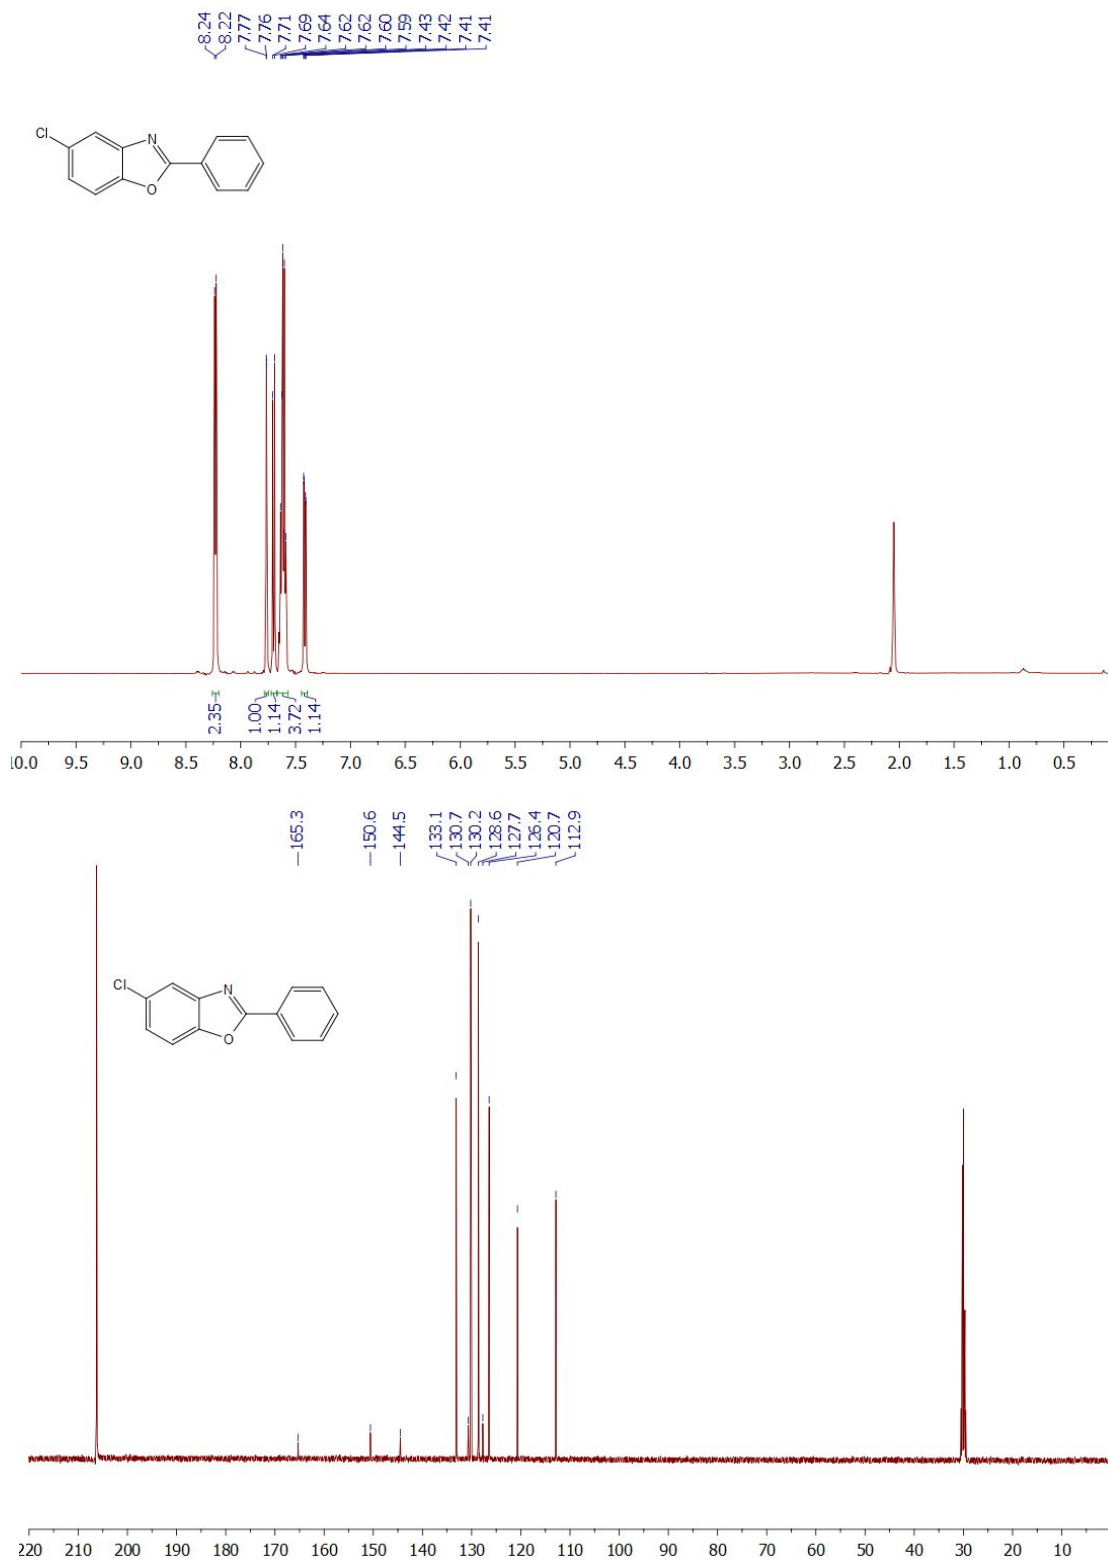

**Figure S18.** <sup>1</sup>H (top) and <sup>13</sup>C (bottom) NMR spectra of 5-chloro-2-phenylbenzoxazole (14).

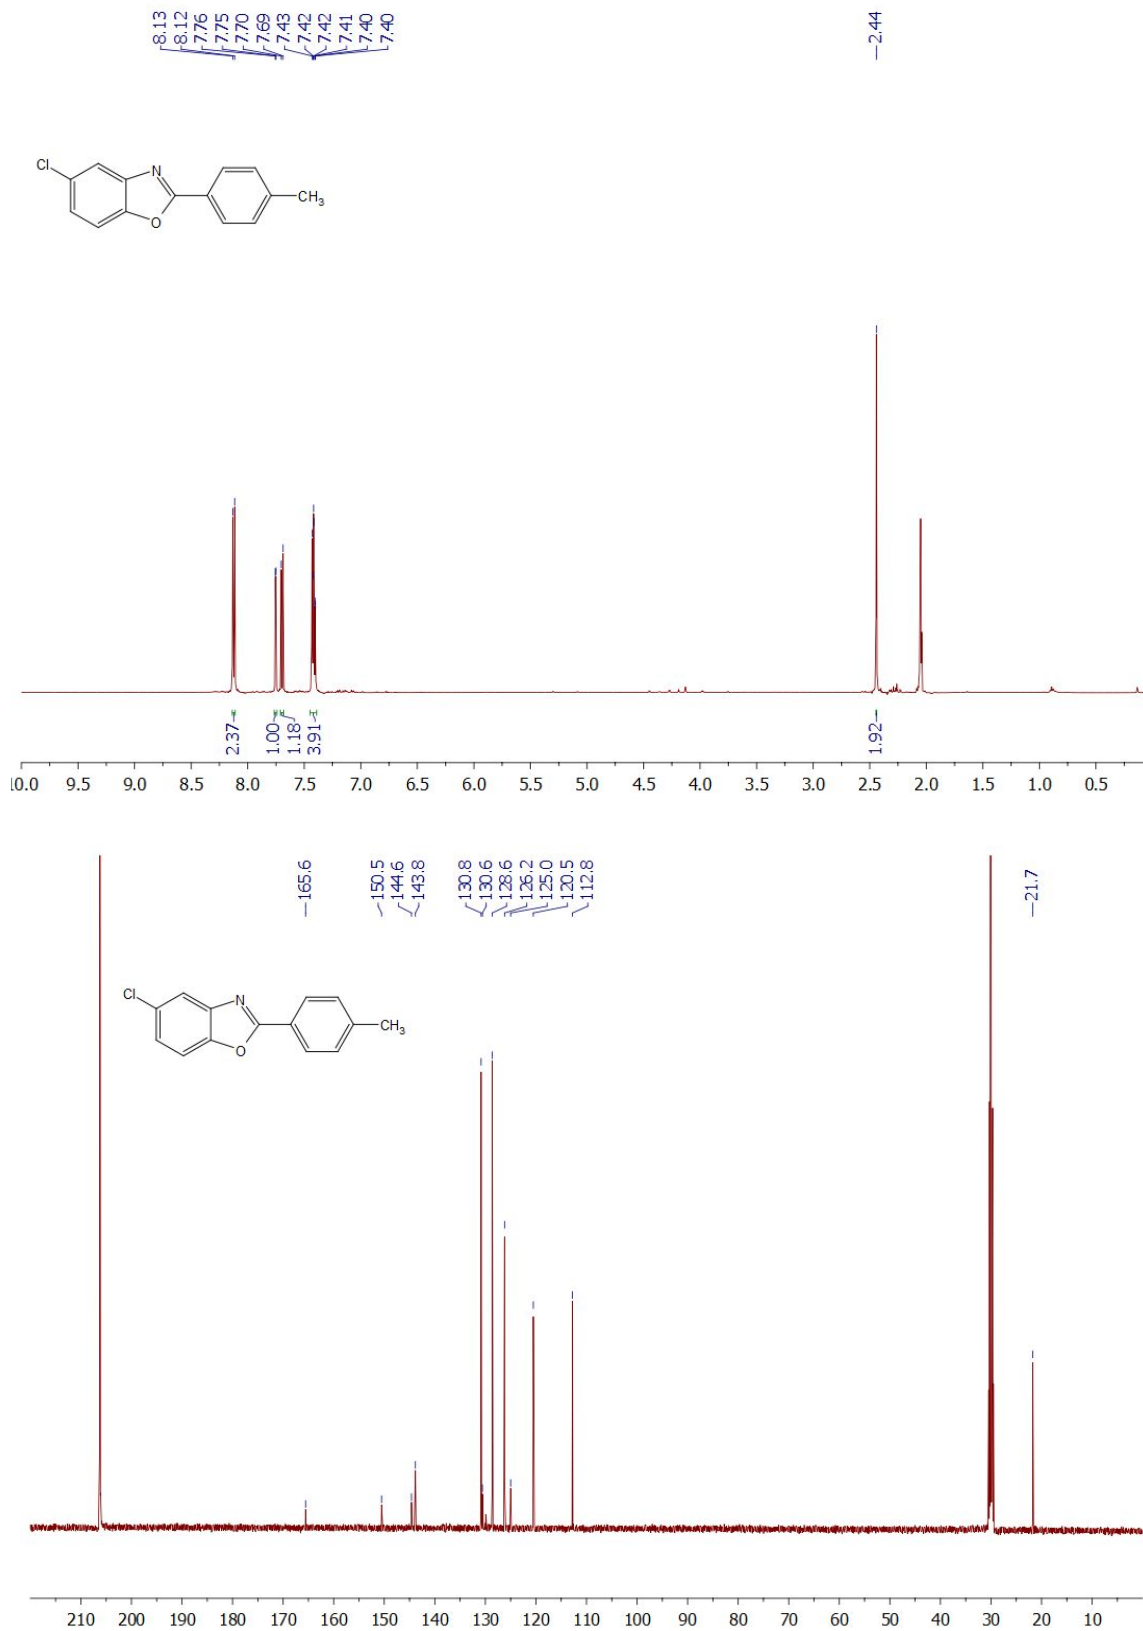

**Figure S19.** <sup>1</sup>H (top) and <sup>13</sup>C (bottom) NMR spectra of 5-chloro-2-(*p*-tolyl)benzoxazole (15).

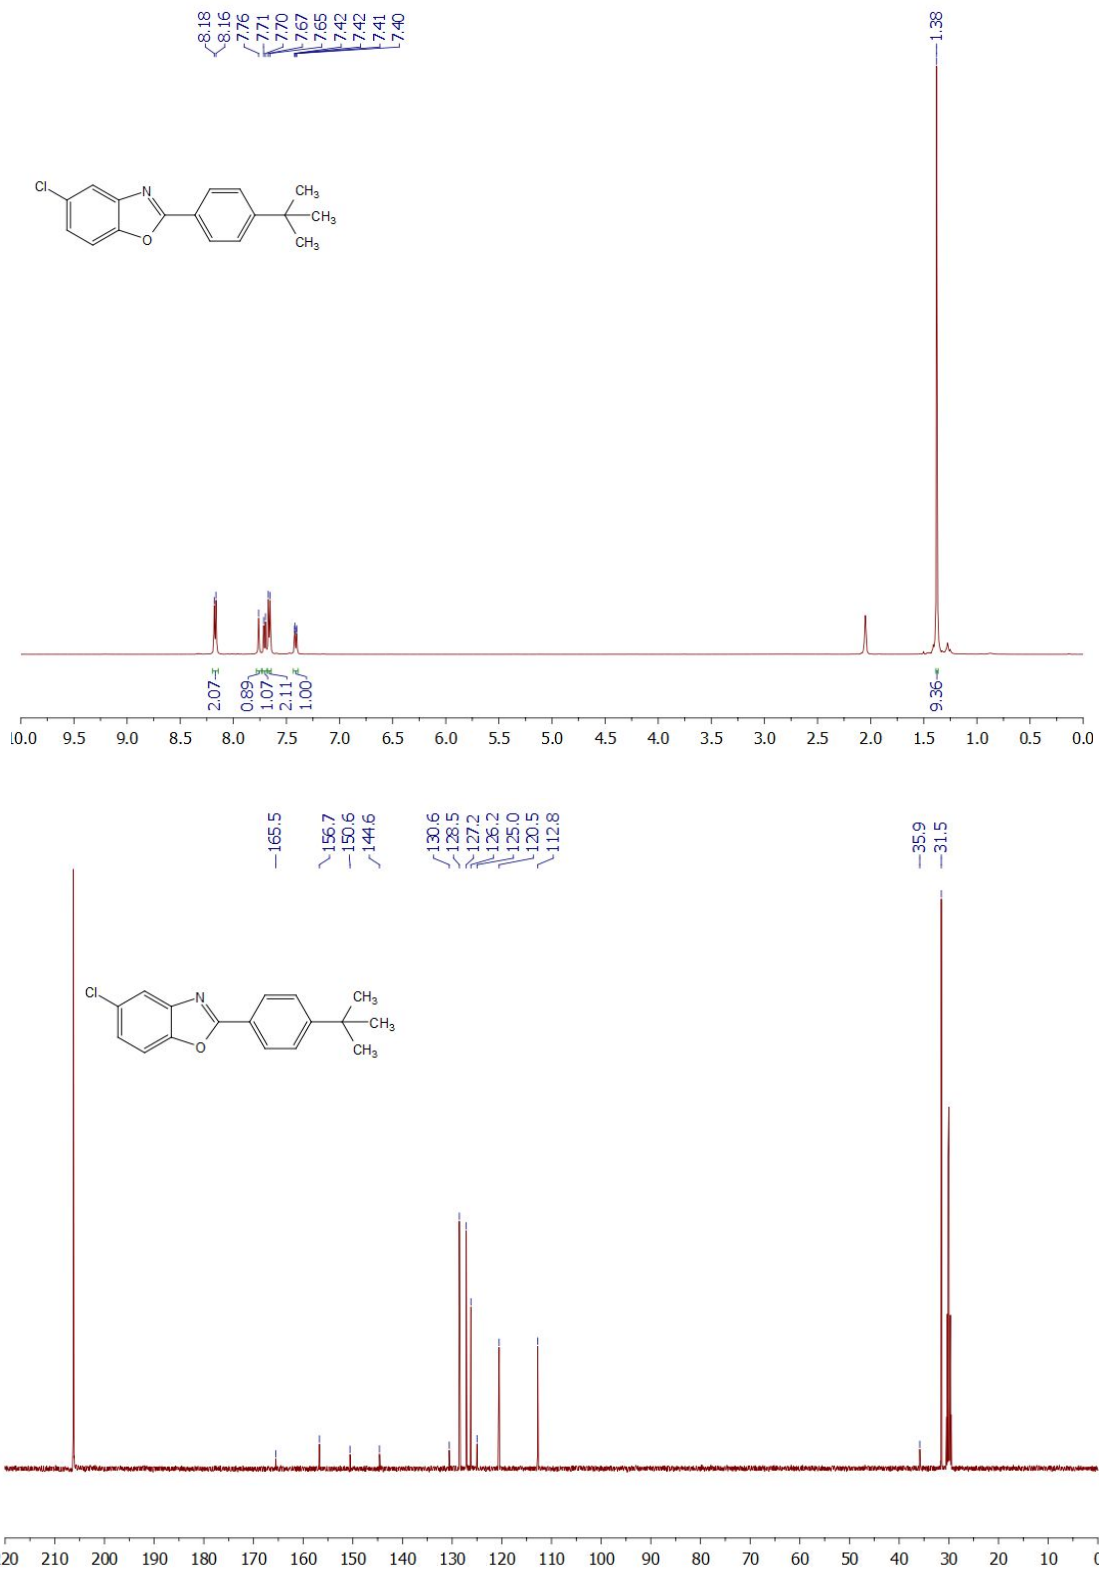

**Figure S20.** <sup>1</sup>H (top) and <sup>13</sup>C (bottom) NMR spectra of 5-chloro-2-(4-*tert*-butylphenyl)benzoxazole (16).

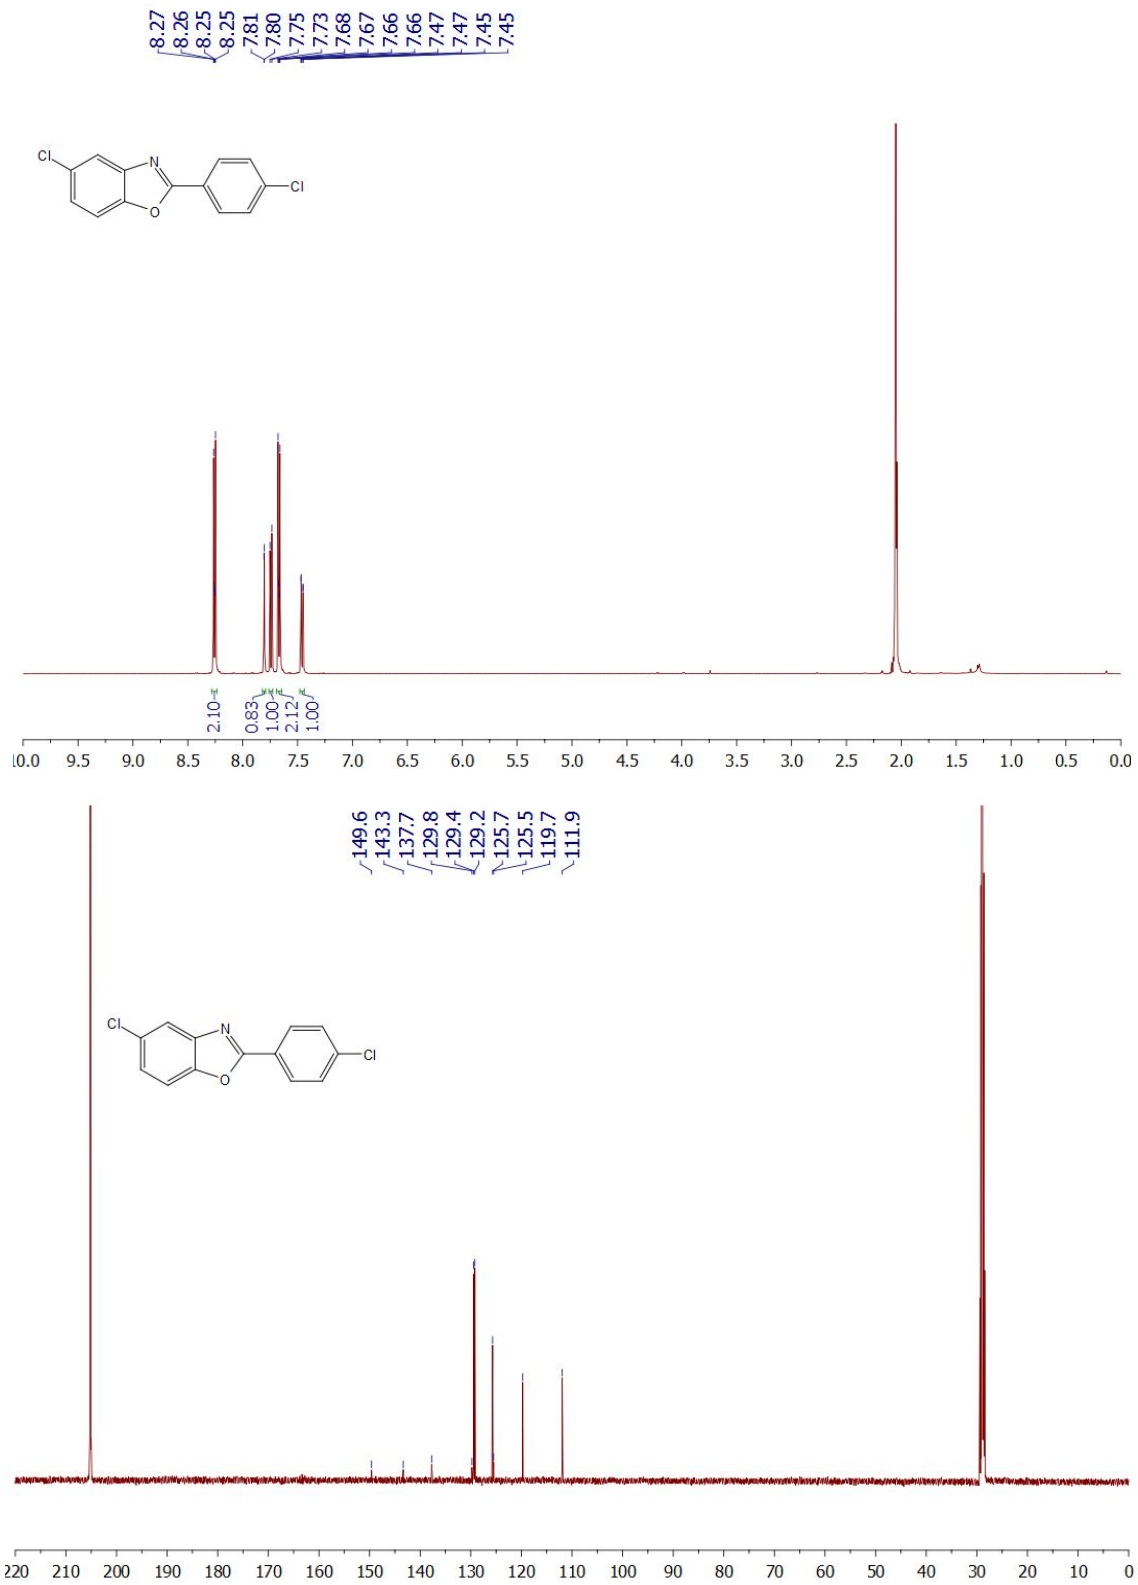

**Figure S21.** <sup>1</sup>H (top) and <sup>13</sup>C (bottom) NMR spectra of 5-chloro-2-(4-chlorophenyl)benzoxazole (17).



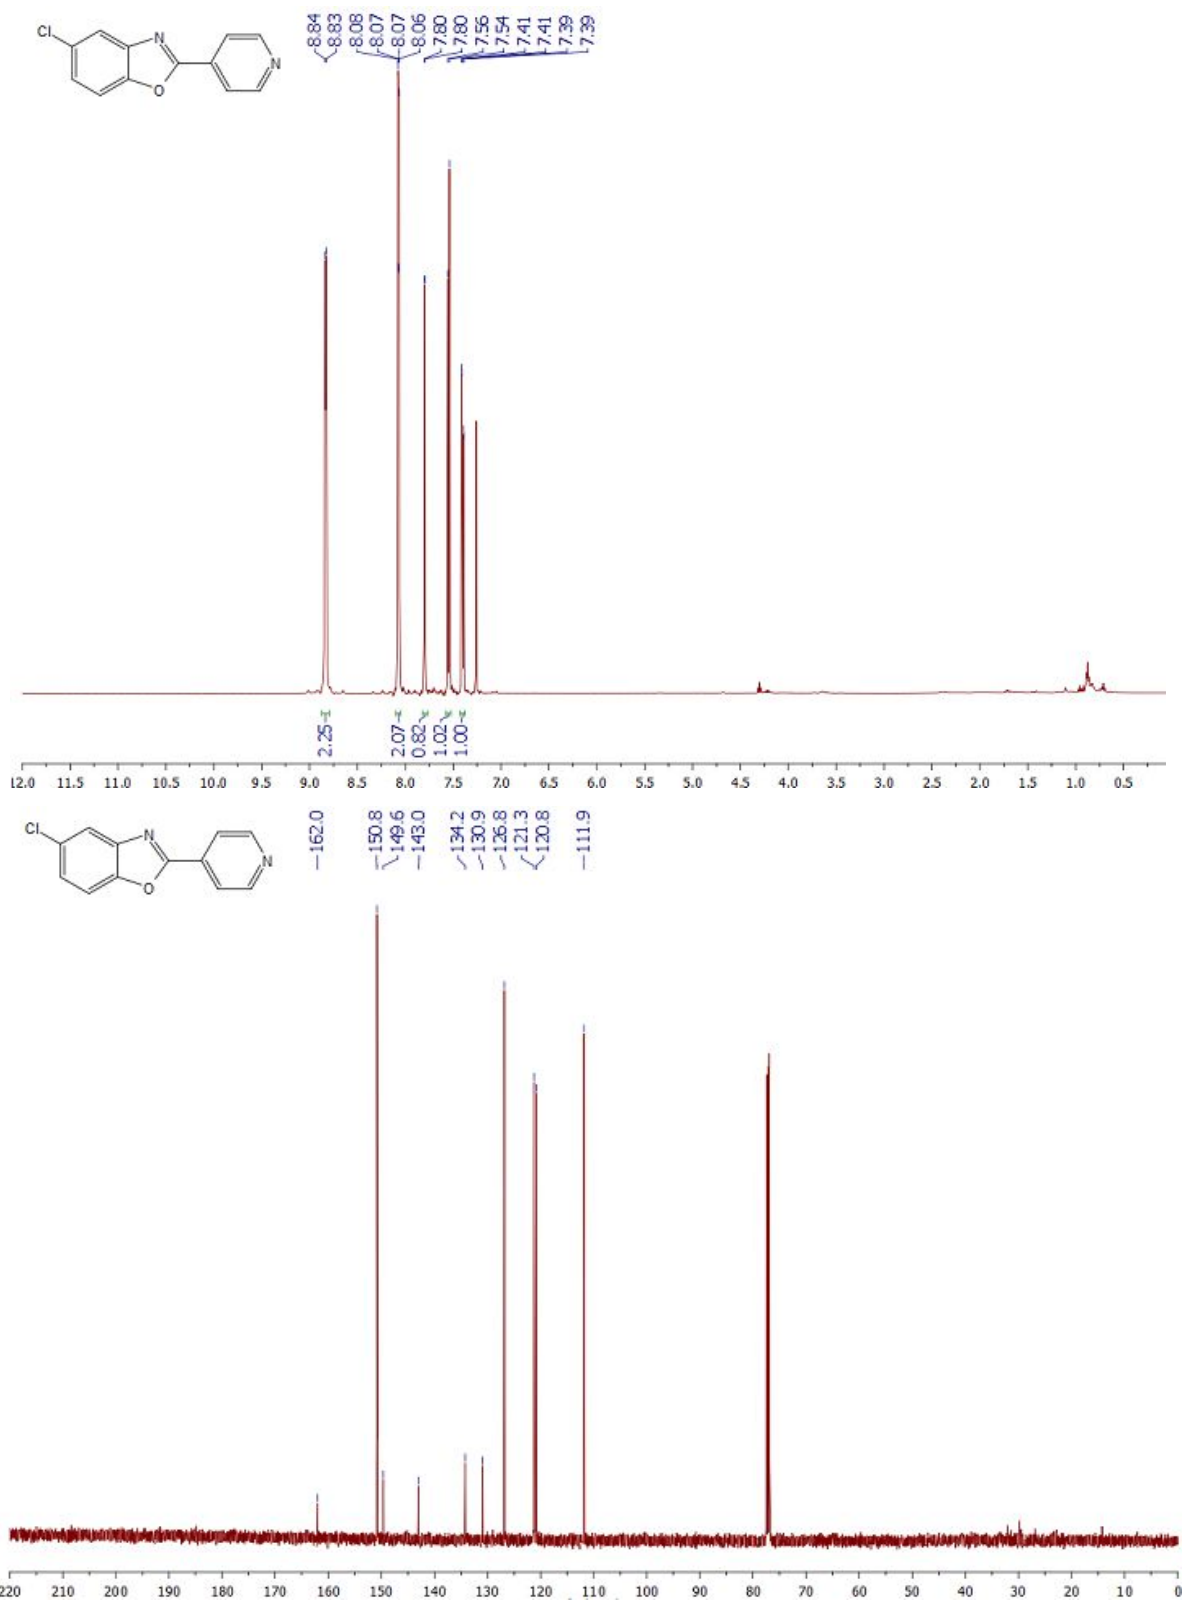

**Figure S22.** <sup>1</sup>H (top) and <sup>13</sup>C (bottom) NMR spectra of 5-chloro-2-(pyridin-4-yl)benzoxazole (18).

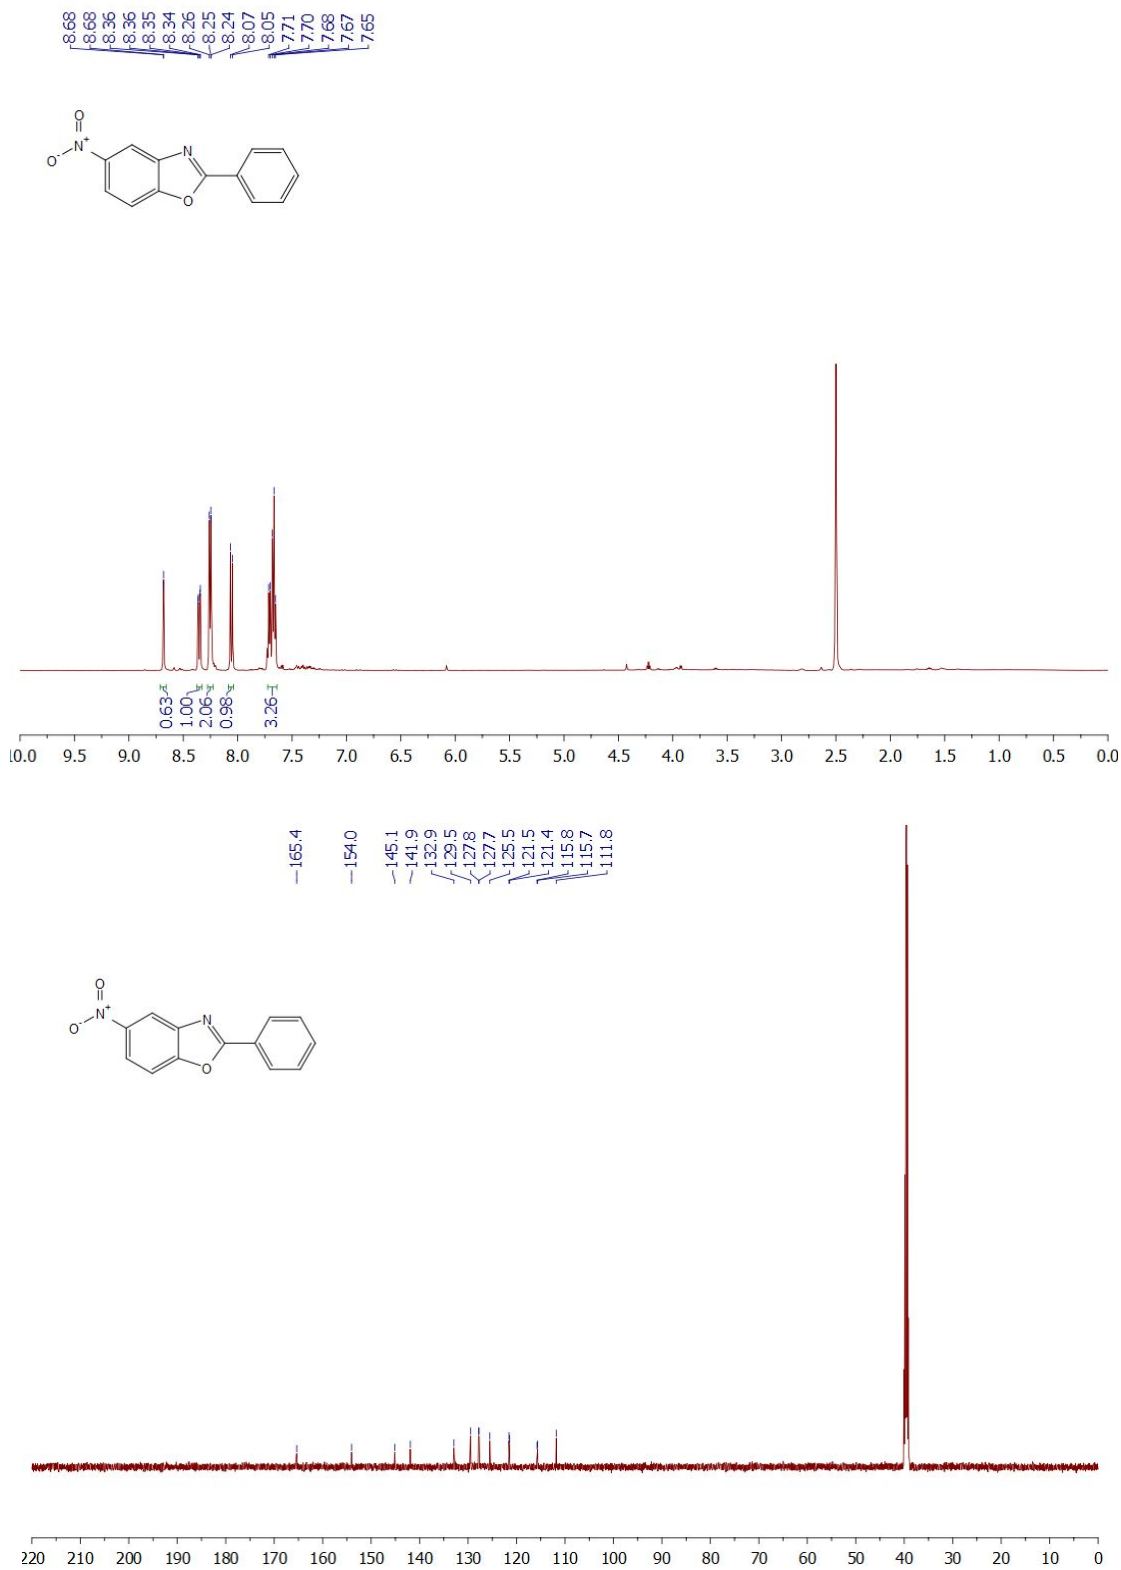

**Figure S23.** <sup>1</sup>H (top) and <sup>13</sup>C (bottom) NMR spectra of 5-nitro-2-phenylbenzoxazole (19).

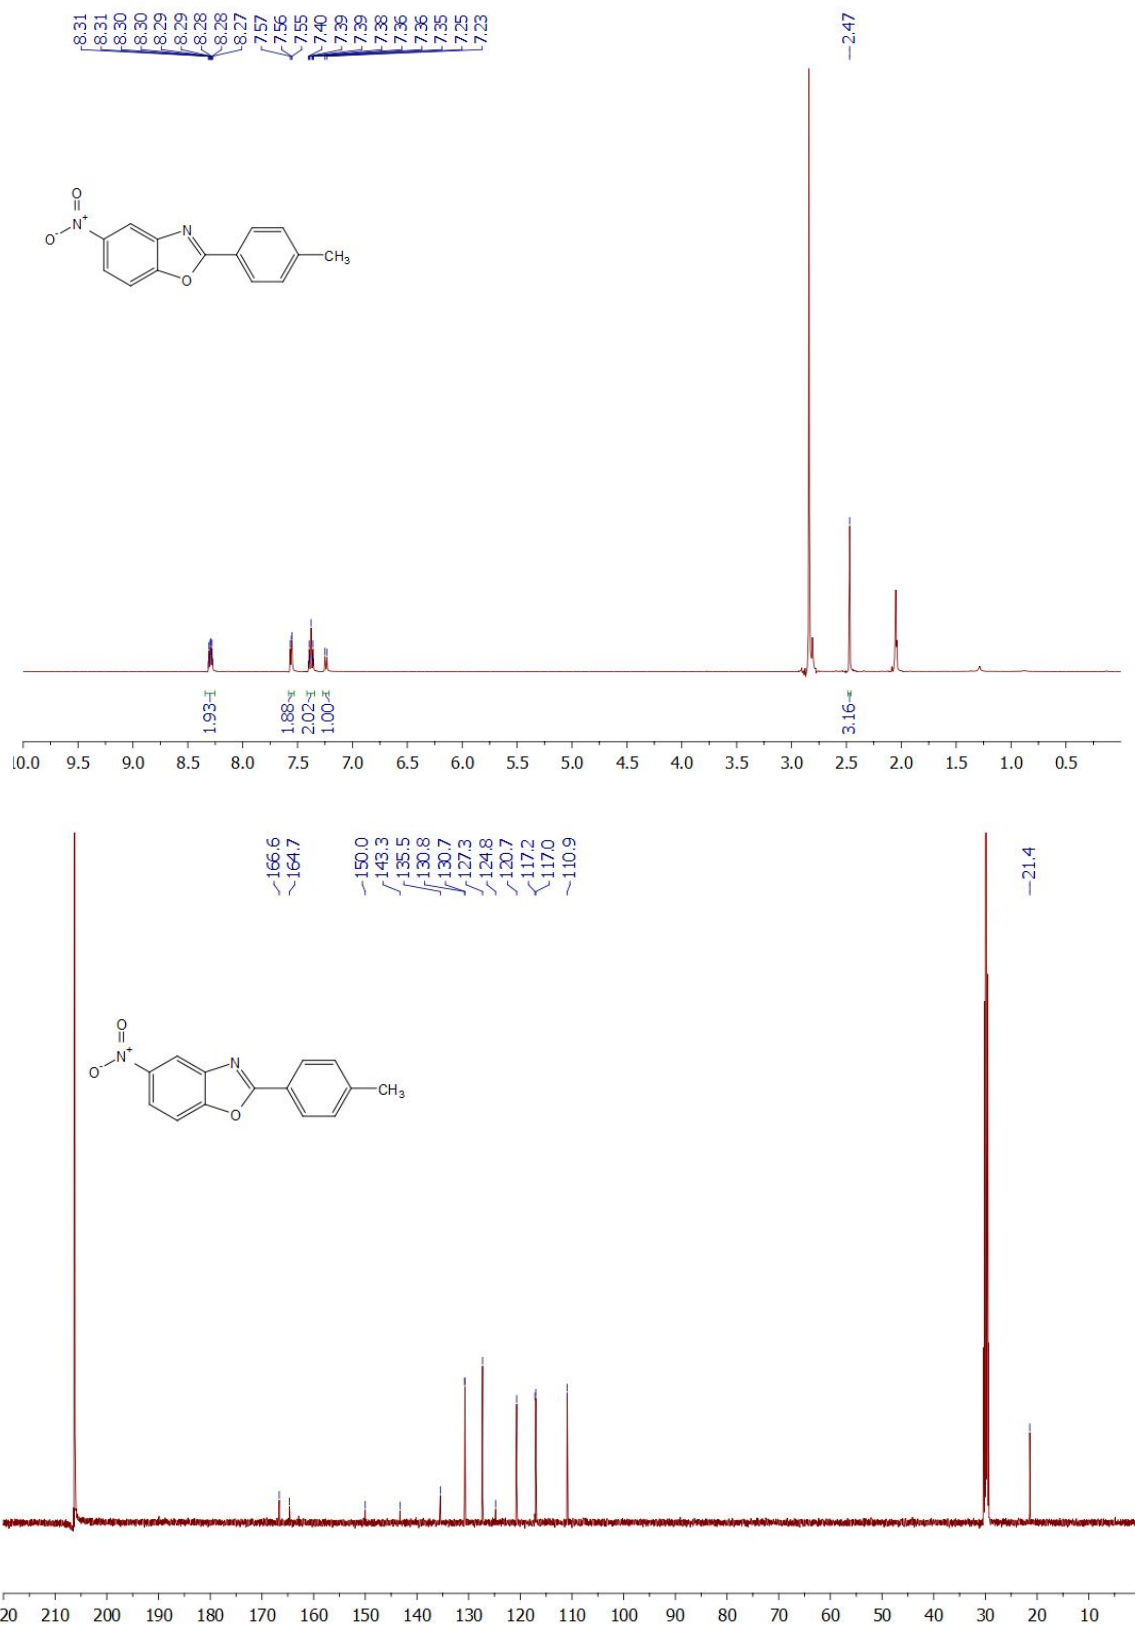

**Figure S24.** <sup>1</sup>H (top) and <sup>13</sup>C (bottom) NMR spectra of 5-nitro-2-(*p*-tolyl)benzoxazole (20).

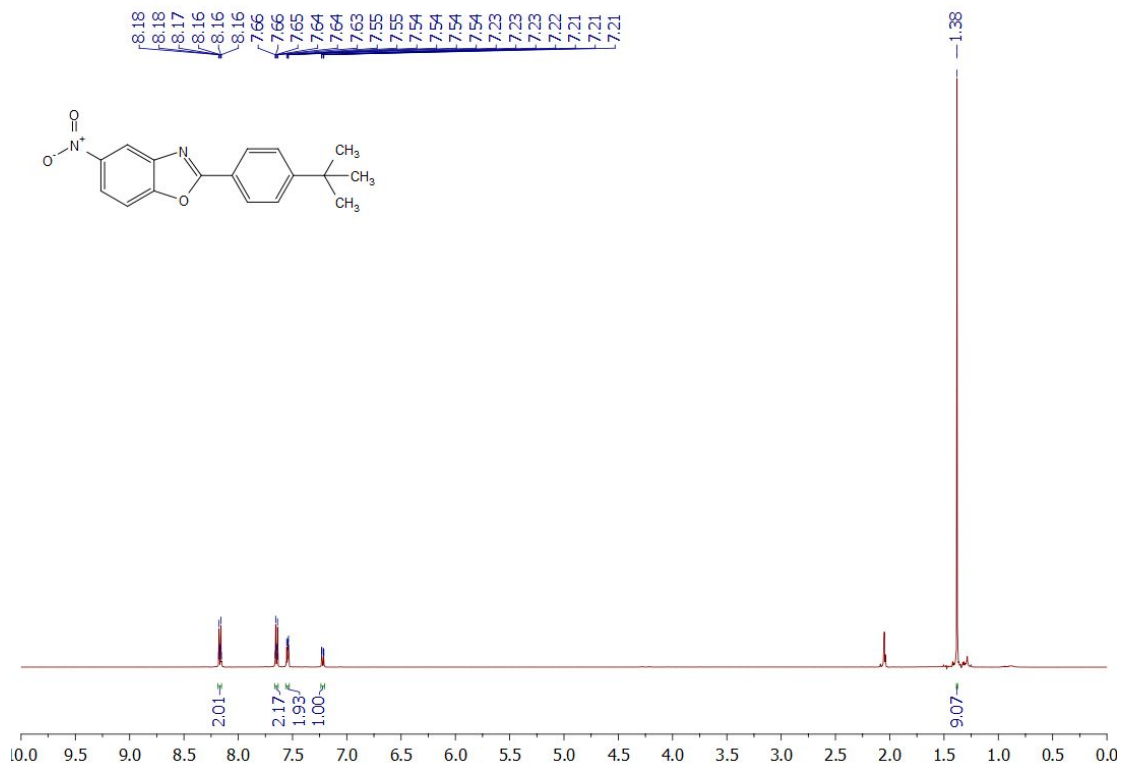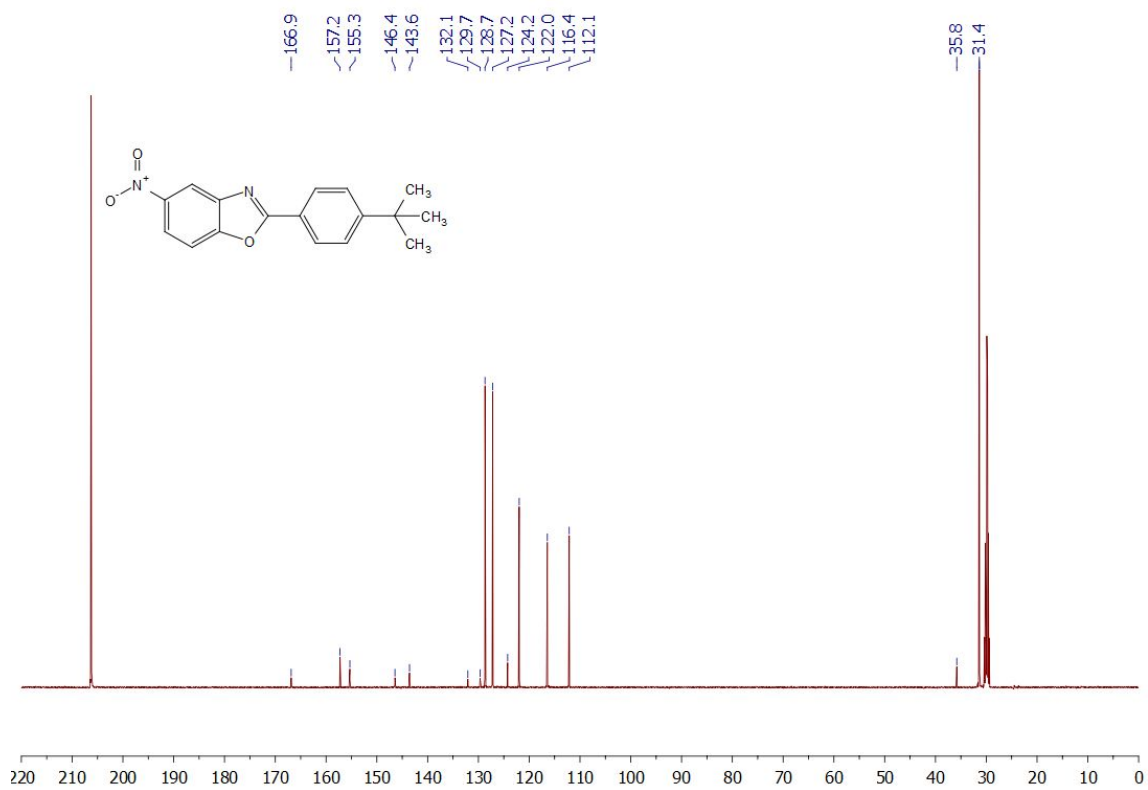

**Figure S25.** <sup>1</sup>H (top) and <sup>13</sup>C (bottom) NMR spectra of 5-nitro-2-(4-*tert*-butylphenyl)benzoxazole (21).

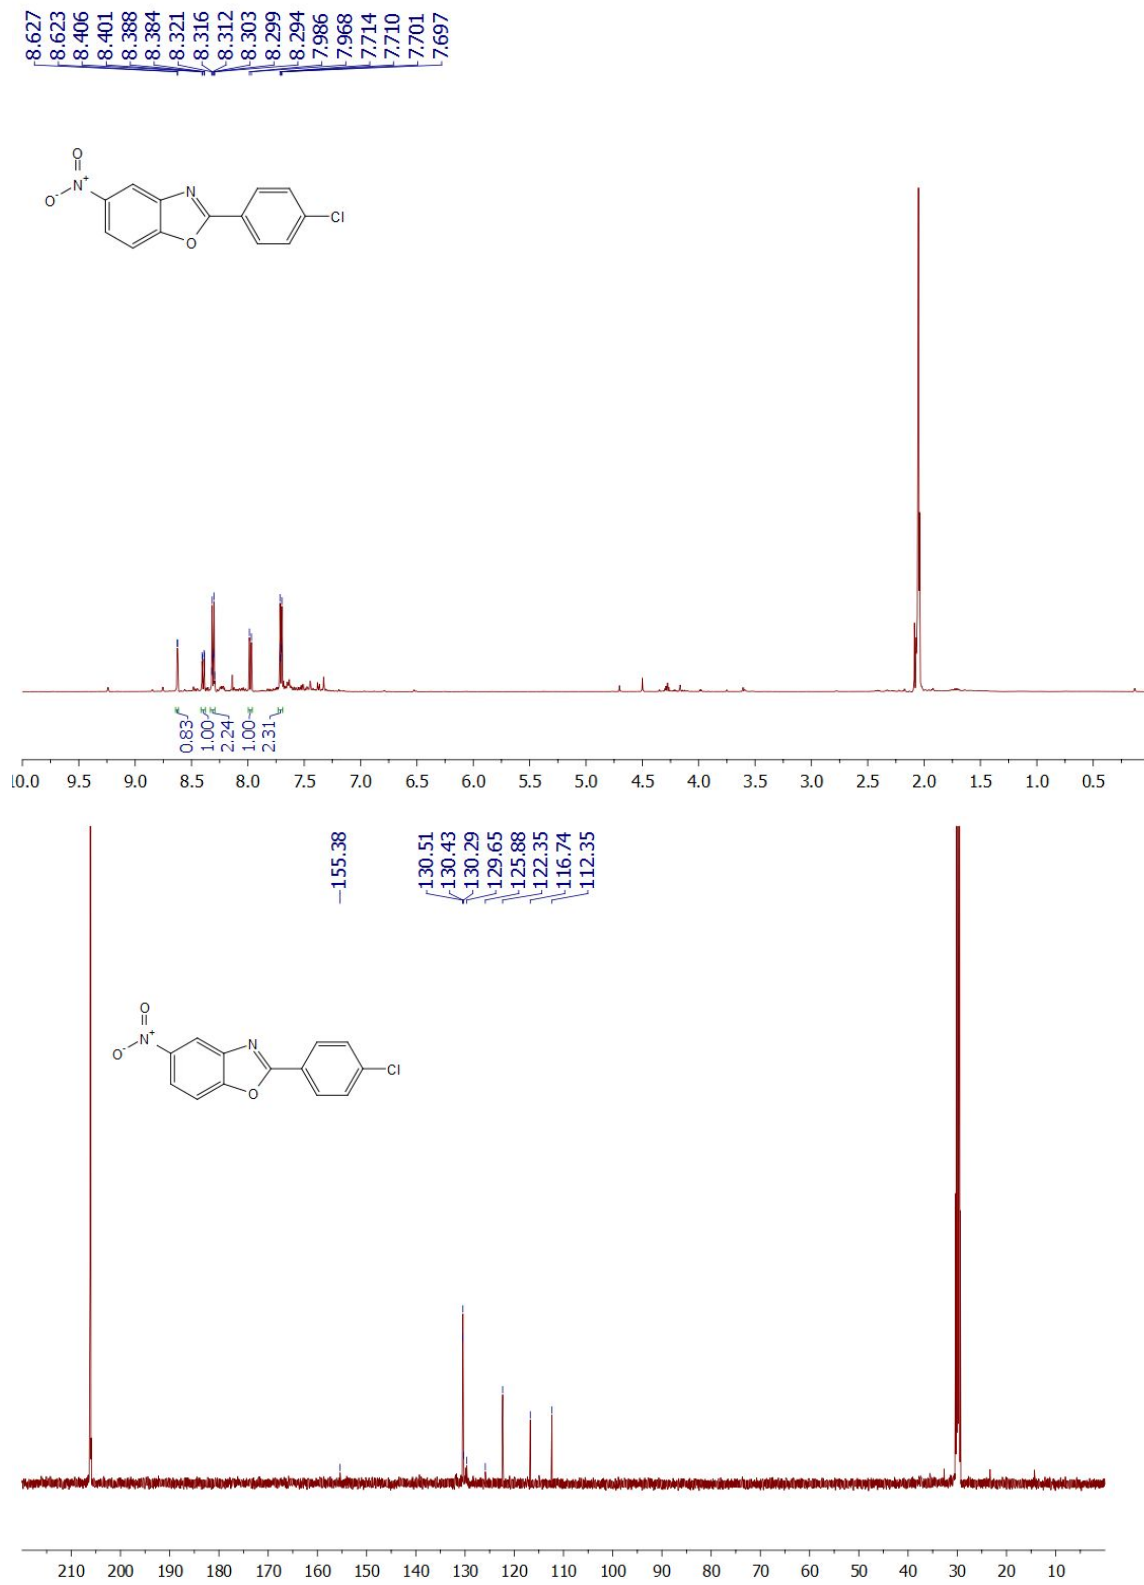

**Figure S26.** <sup>1</sup>H (top) and <sup>13</sup>C (bottom) NMR spectra of 5-nitro-2-(4-chlorophenyl)benzoxazole (22).

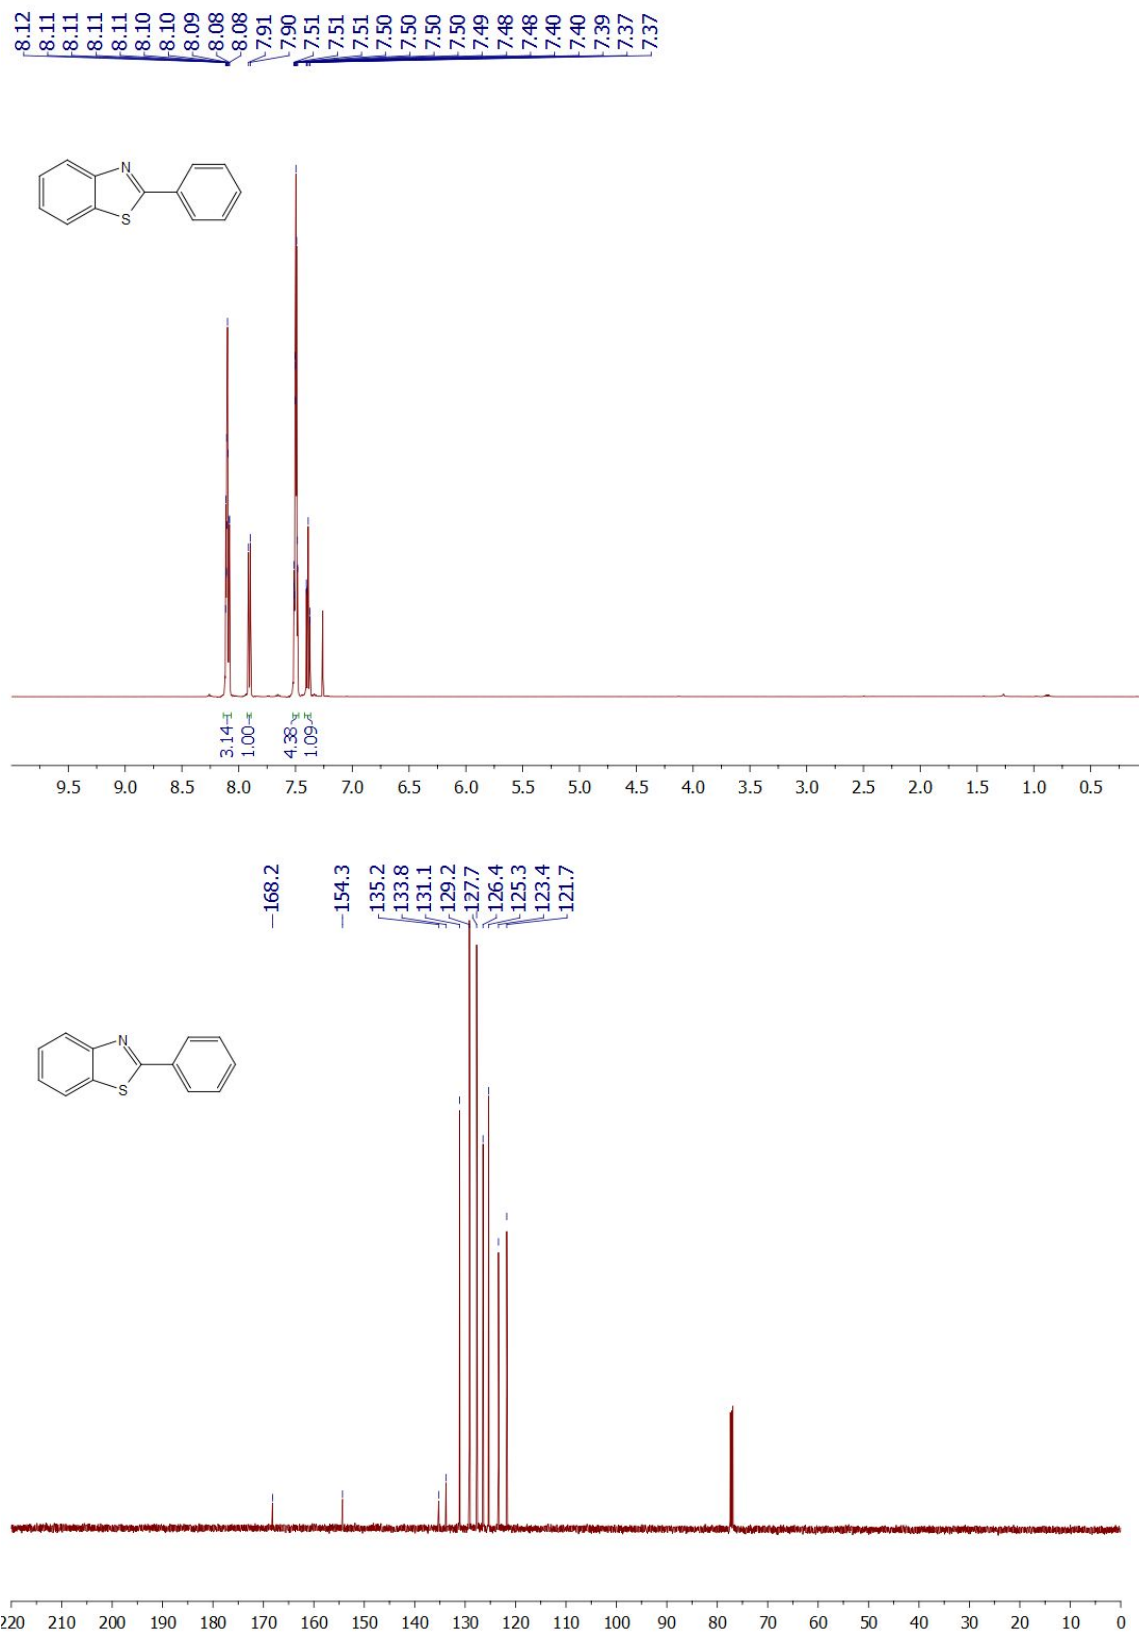

Figure S27.  $^1\text{H}$  (top) and  $^{13}\text{C}$  (bottom) NMR spectra of 2-phenylbenzothiazole (23).

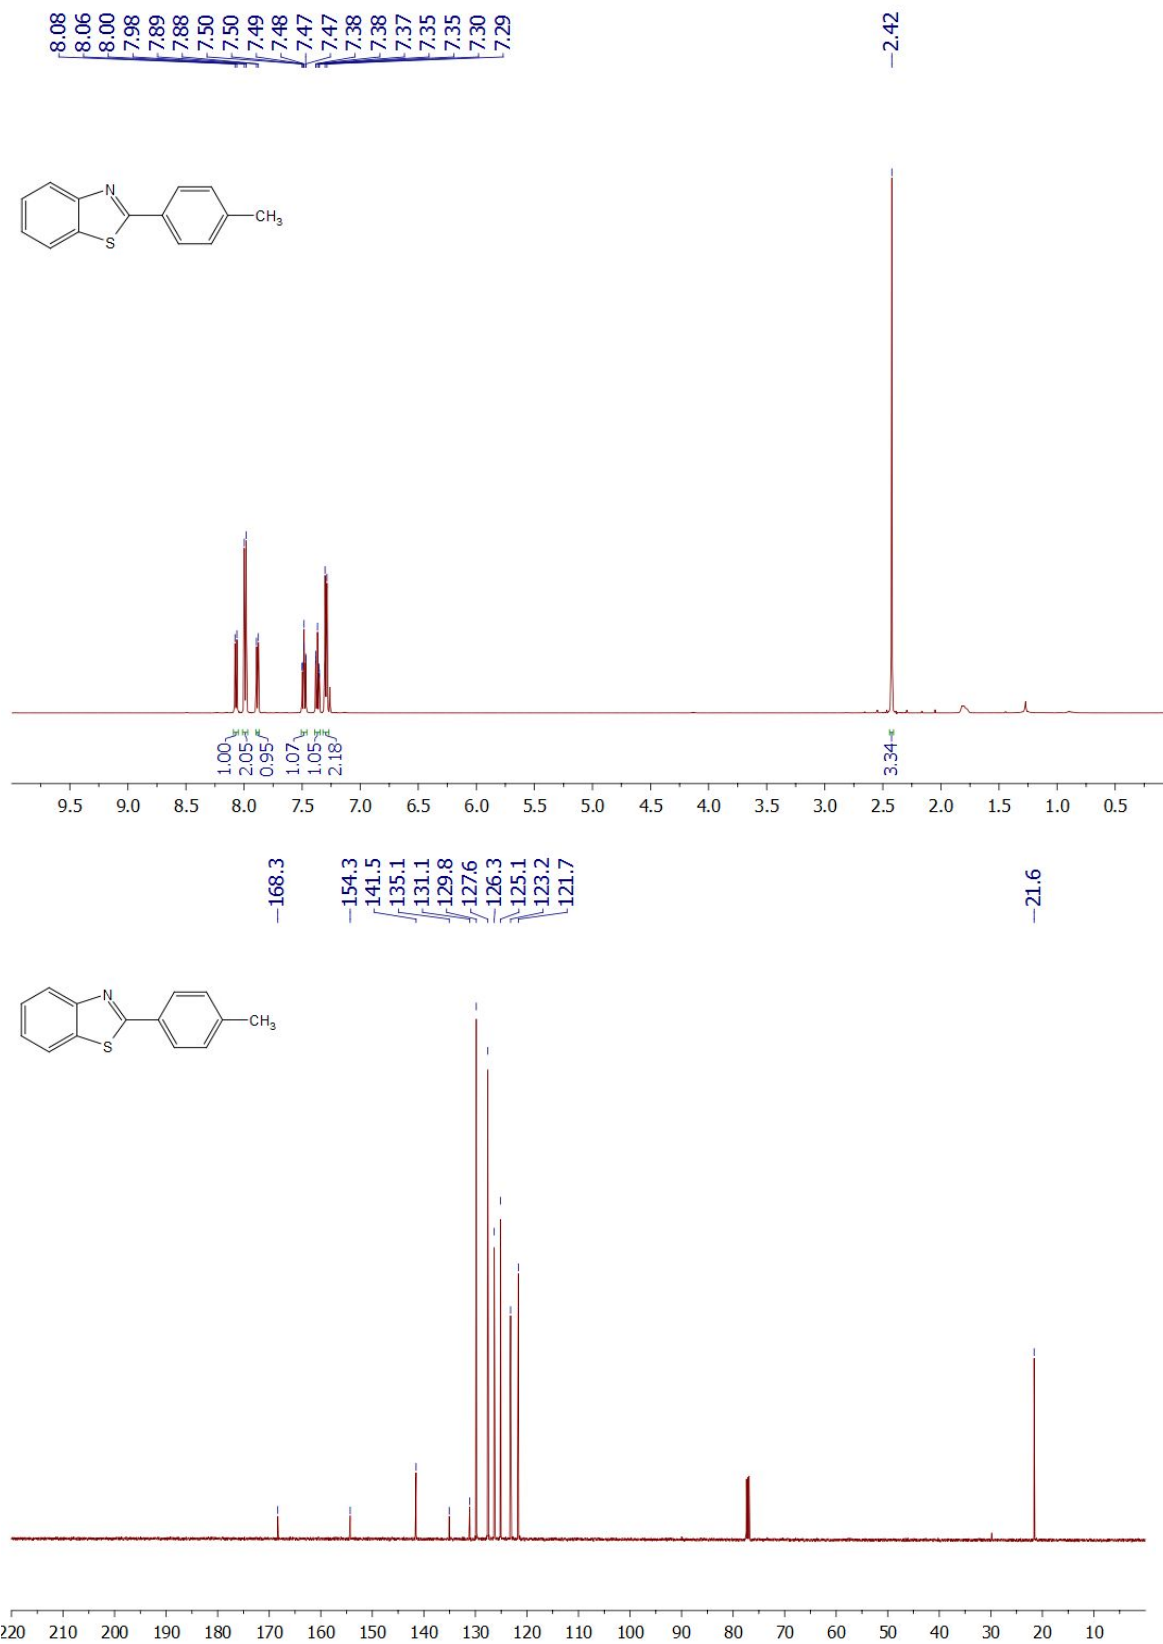

**Figure S28.** <sup>1</sup>H (top) and <sup>13</sup>C (bottom) NMR spectra of 2-(*p*-tolyl)benzothiazole (24).

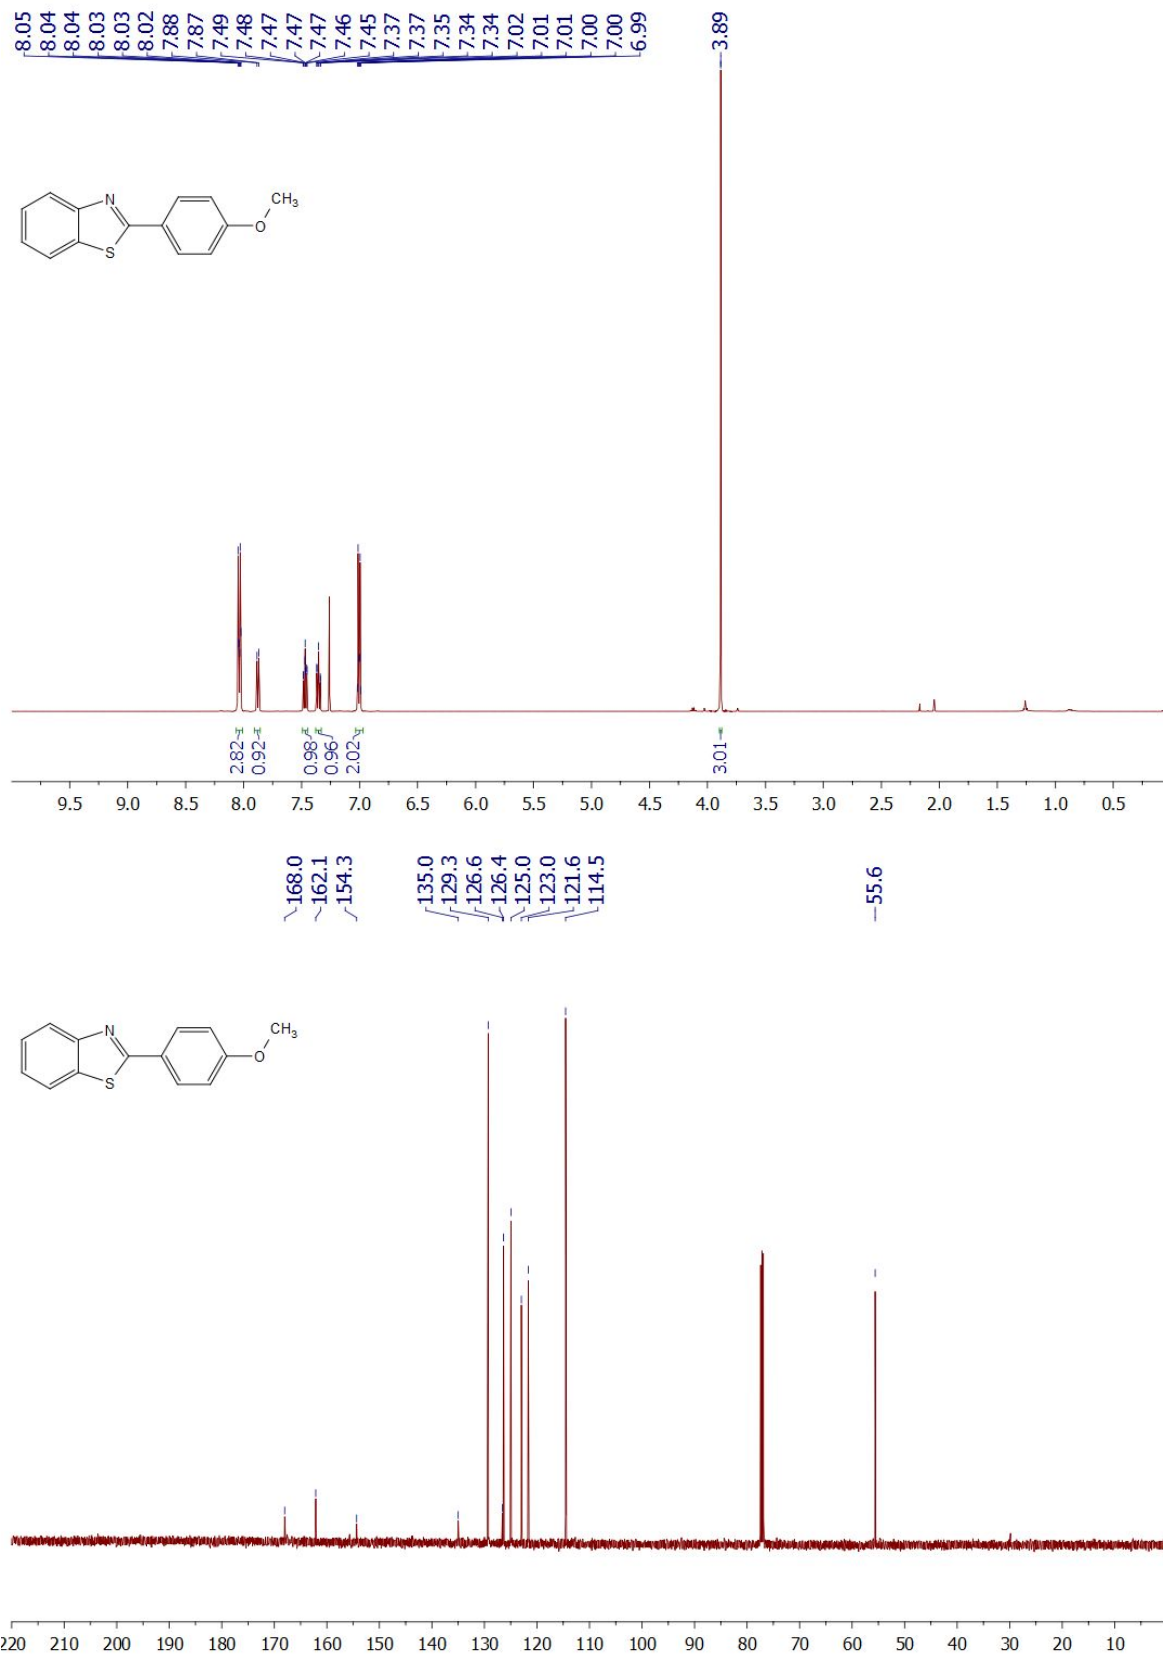

**Figure S29.** <sup>1</sup>H (top) and <sup>13</sup>C (bottom) NMR spectra of 2-(4-methoxyphenyl)benzothiazole (25).



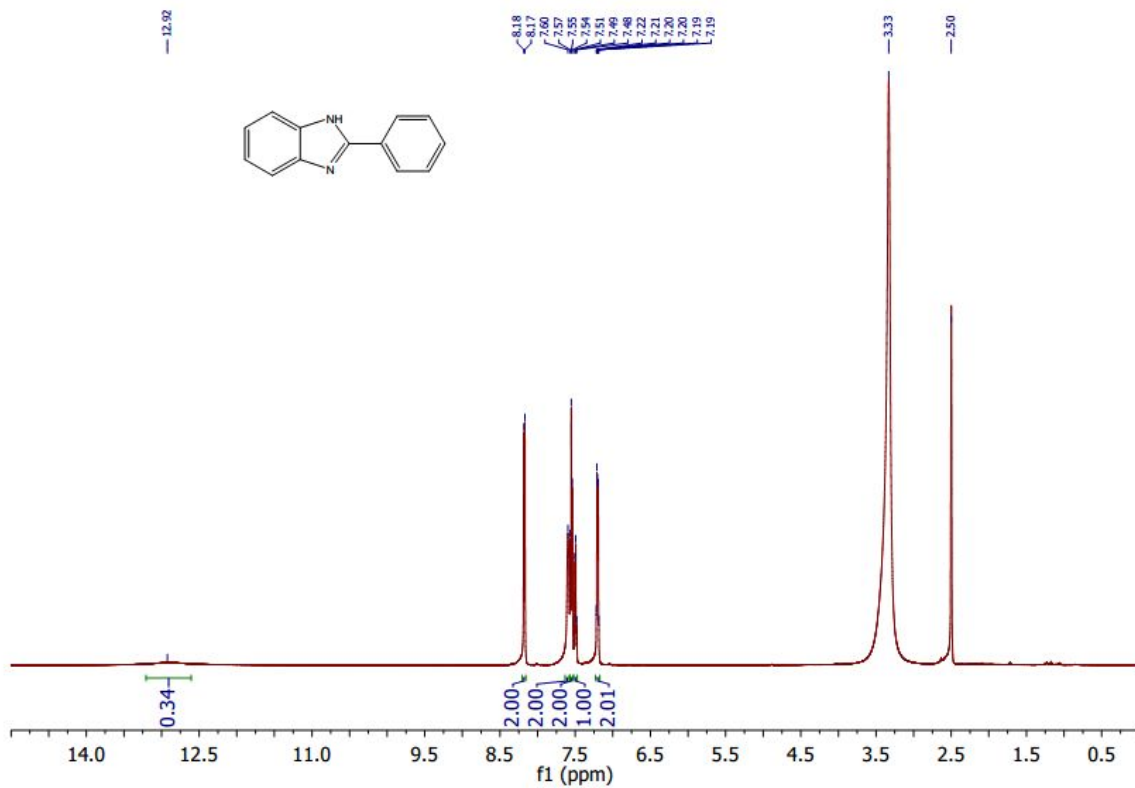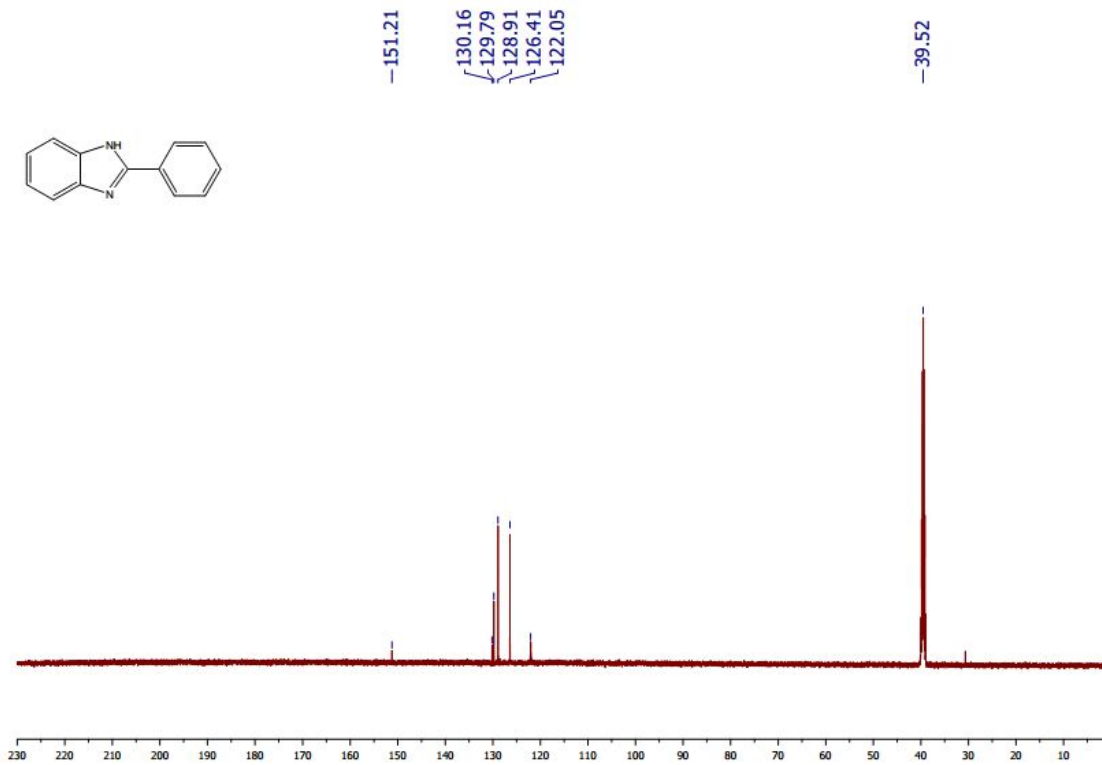

**Figure S30.**  $^1\text{H}$  (top) and  $^{13}\text{C}$  (bottom) NMR spectra of 2-phenylbenzimidazole (26).

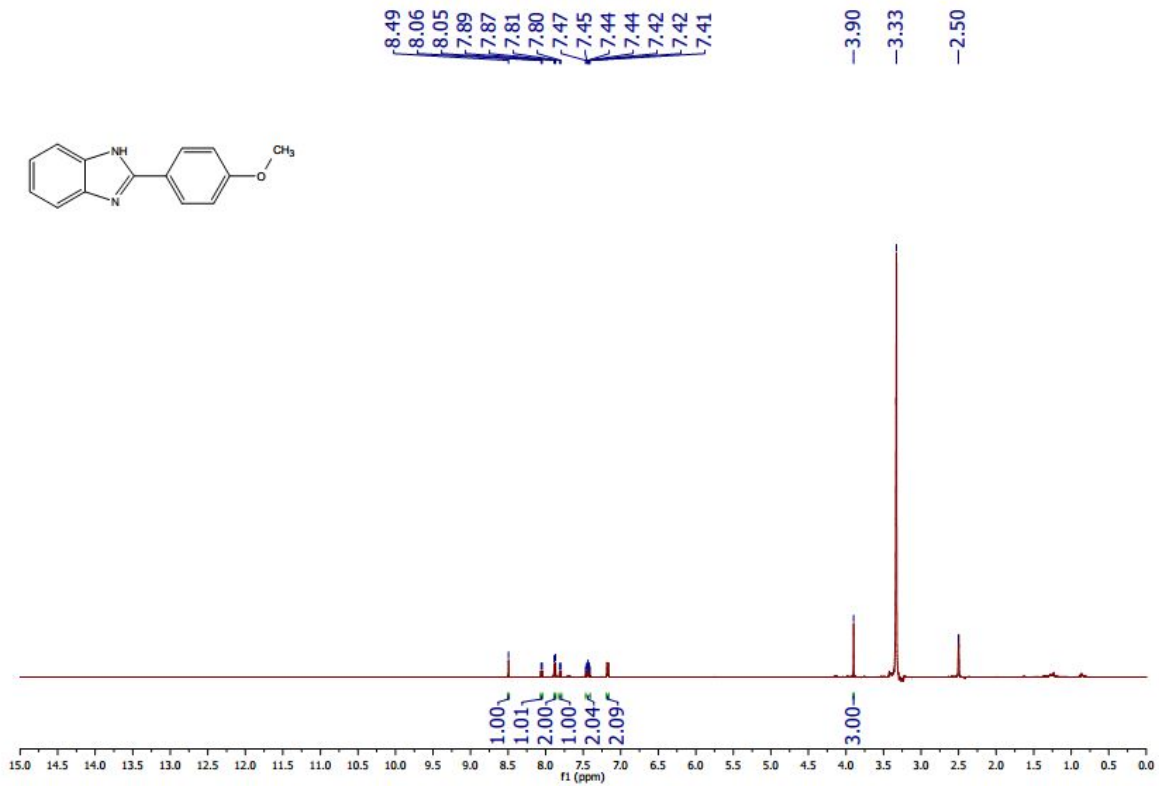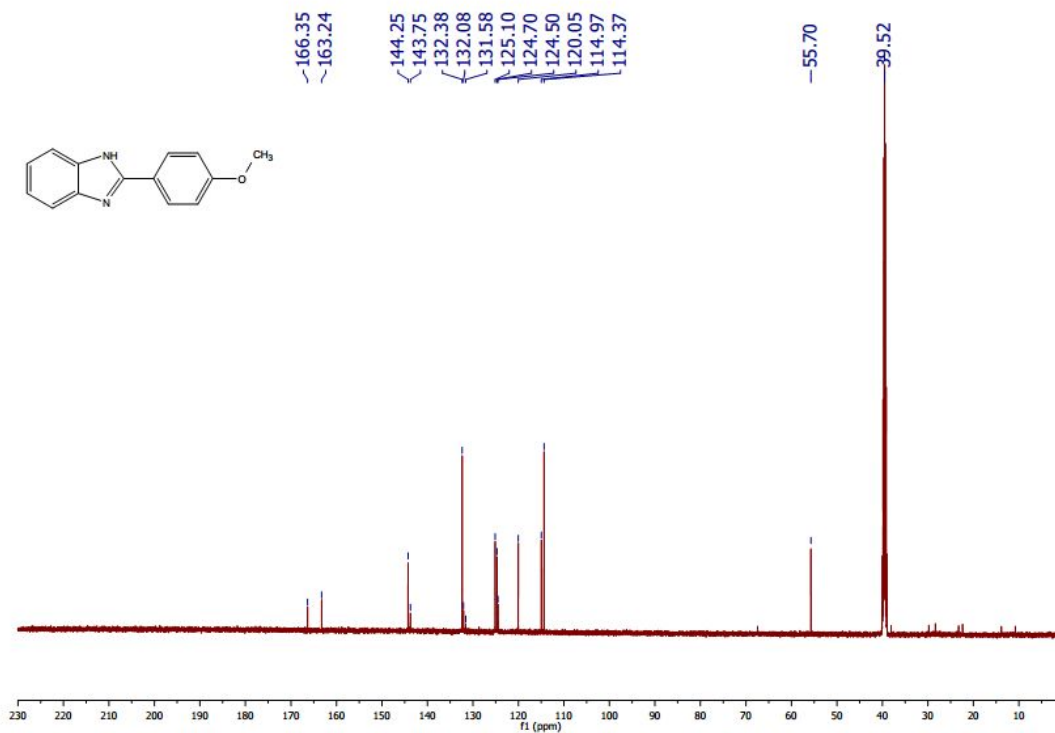

**Figure S31.** <sup>1</sup>H (top) and <sup>13</sup>C (bottom) NMR spectra of 2-(4-methoxyphenyl)benzimidazole (27).

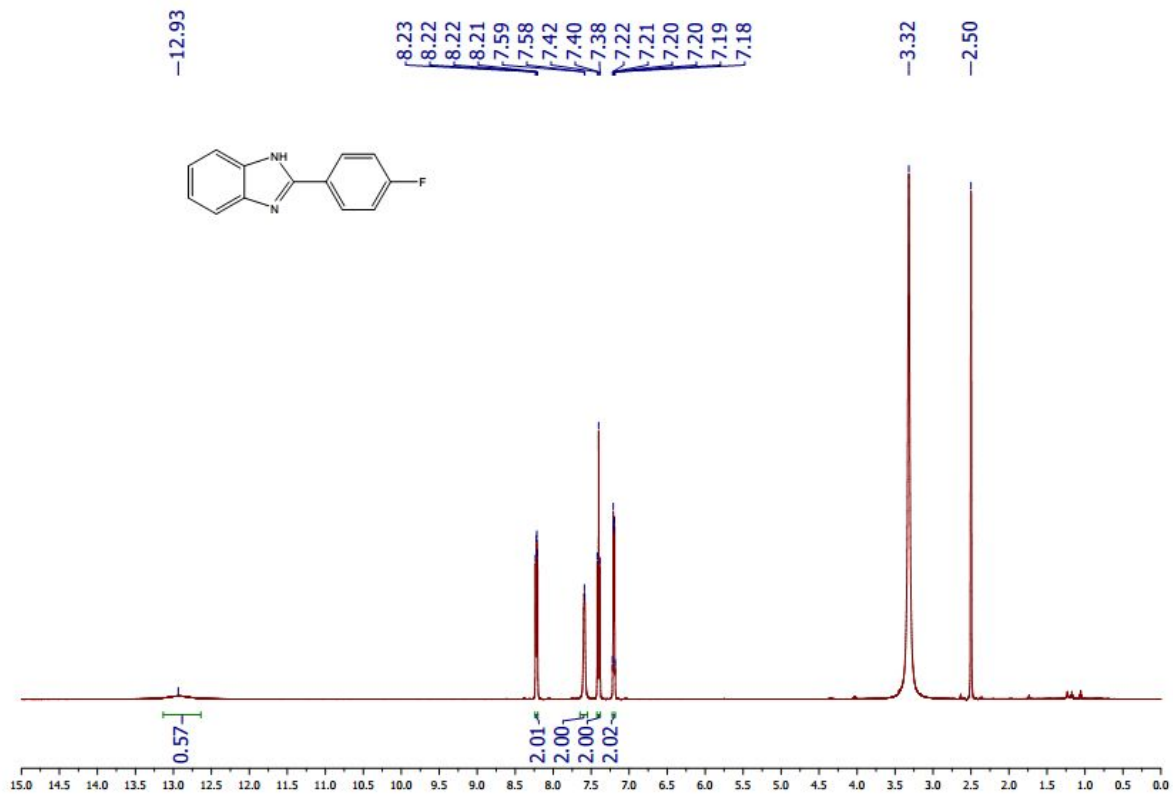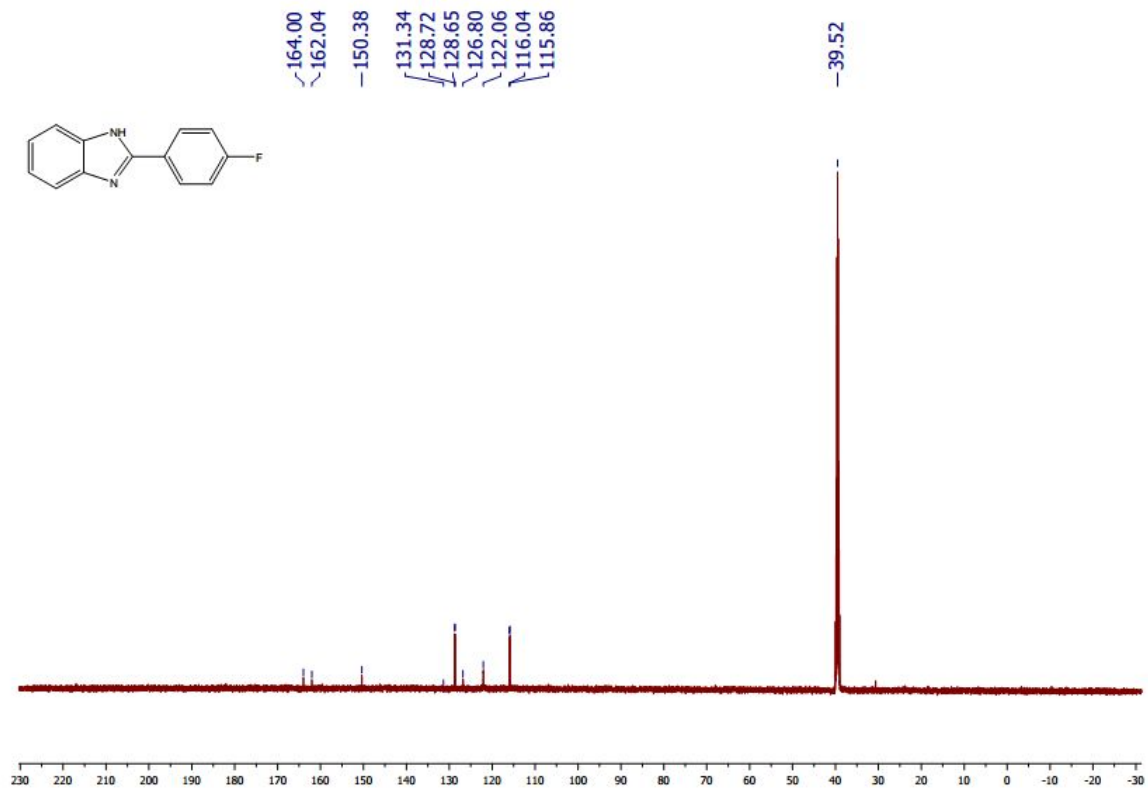

Figure S32. <sup>1</sup>H (top) and <sup>13</sup>C (bottom) NMR spectra of 2-(4-fluorophenyl)benzimidazole (28).

### Section S3. References

1. Teo, Y. C., Riduan, S. N., Zhang, Y. Iodine-mediated arylation of benzoxazoles with aldehydes. *Green Chem.* **15**, 2365–2368 (2013).
2. Tang, L., Guo, X., Yang, Y., Zha, Z., Wang, Z. Gold nanoparticles supported on titanium dioxide: an efficient catalyst for highly selective synthesis of benzoxazoles and benzimidazoles. *Chem. Commun.* **50**, 6145–6148 (2014).
3. Patil, M. R., Bhanushali, J. T., Nagaraja, B. M., Keri, R. S. TiO<sub>2</sub>ZrO<sub>2</sub> composite: Synthesis, characterization and application as a facile, expeditious and recyclable catalyst for the synthesis of 2-aryl substituted benzoxazole derivatives. *Comptes Rendus Chim.* **21**, 399–407 (2018).
4. Ferguson, D., Rudolph, S. R. Nickel-catalyzed C–H arylation of benzoxazoles and oxazoles: benchmarking the influence of electronic, steric and leaving group variations in phenolic electrophiles. *Tetrahedron* **73**, 2196–2209 (2017).
5. Zhou, Q., Zhang, J.-F., Cao, H., Zhong, R., Hou, X.-F. Synthesis of *o*-alkenylated 2-arylbenzoxazoles via Rh-catalyzed oxidative olefination of 2-arylbenzoxazoles: scope investigation, structural features, and mechanism studies. *J. Org. Chem.* **81**, 12169–12180 (2016).
6. Gupta, R., Sahu, P. K., Sahu, P. K., Srivastava, S. K., Agarwal, D. D. Environmental benign synthesis of novel double layered nano catalyst and their catalytic activity in synthesis of 2-substituted benzoxazoles. *Catal. Commun.* **92**, 119–123 (2017).
7. Srivastava, A., Shukla, G., Singh, M. S. *p*-Toluenesulfonic acid-catalyzed metal-free formal [4+1] heteroannulation via N-H/O-H/S-H functionalization: One-pot access to 2-aryl/hetaryl/alkyl benzazole derivatives. *Tetrahedron* **73**, 879–887 (2017).
8. Reyes, H., Beltran, H. I., Rivera-Becerril, E. One pot synthesis of 2-phenylbenzoxazoles by potassium cyanide assisted reaction of *o*-aminophenols and benzaldehydes. *Tetrahedron Lett.* **52**, 308–310 (2011).

9. Vosooghi, M., Saeedi, M., Mahdavi, M., Jafapour, F., Shafiee, A., Foroumadi, Al. A novel and efficient route for the synthesis of 5-nitrobenzo[*d*]oxazole derivatives. *J. Fluor. Chem.* **161**, 83–86 (2014).
10. Yalçın, İ., Şener, E., Özden, T., Özden, S., Akın, A. Synthesis and microbiological activity of 5-methyl-2-[*p*-substituted phenyl] benzoxazoles. *Eur. J. Med. Chem.* **25**, 705–708 (1990).
11. Nguyen, L. A., Ngo, Q. A., Retailleau, P., Nguyen, T. B. Elemental sulfur as a polyvalent reagent in redox condensation with *o*-chloronitrobenzenes and benzaldehydes: three-component access to 2-arylbenzothiazoles. *Green Chem.* **19**, 4289–4293 (2017).
12. Azizian, J., Torabi, P., Noei, J. Synthesis of benzimidazoles and benzoxazoles using TiCl<sub>3</sub>OTf in ethanol at room temperature. *Tetrahedron Lett.* **57**, 185–188 (2016).
